# Supplementary material for: Marine Bioactive Peptides—An Overview of Generation, Structure and Application with a Focus on Food Sources
Source: PubMed Central journal article supplement (PMC7460072; doi:10.3390/md18080424), 2020-08-13
Supplement: marinedrugs-18-00424-s001.pdf [file marinedrugs-18-00424-s001.pdf]

Review

# Marine Bioactive Peptides—An Overview of Generation, Structure, and Application with a Focus on Food Sources

Milica Pavlicevic <sup>1</sup>, Elena Maestri <sup>2,3,\*</sup> and Marta Marmiroli <sup>2</sup>

<sup>1</sup> Institute for Food Technology and Biochemistry, Faculty of Agriculture, University of Belgrade, 11070 Belgrade, Serbia; mpavlicevic@agrif.bg.ac.rs

<sup>2</sup> Department of Chemistry, Life Sciences and Environmental Sustainability, and SITEIA.PARMA, University of Parma, 43124 Parma, Italy; marta.marmiroli@unipr.it

<sup>3</sup> Consorzio Italbiotec, Via Fantoli 16/15, 20138 Milan, Italy

\* Correspondence: elena.maestri@unipr.it

Table S1. – Complete list of peptides from marine organisms and corresponding references.

| Sequence | Activity      | Source          | Taxonomy*                          | EC50 | Length | Note                                 | Reference |
|----------|---------------|-----------------|------------------------------------|------|--------|--------------------------------------|-----------|
| AW       | antioxidative | marine Bivalvia | <i>Mactra quadrangularis</i> Reeve | /    | 2      | Whole protein hydrolyzate; ribosomal | [1]       |
| CF       | ACE inhibitor | marine Pisces   | Elasmobranchii                     | 1.96 | 2      | Whole protein hydrolyzate; ribosomal | [2]       |
| DI       | ACE inhibitor | marine Pisces   | <i>Scorpaena notata</i> Rafinesque | 0.98 | 2      | Whole protein hydrolyzate; ribosomal | [3]       |
| EI       | ACE inhibitor | marine Pisces   | <i>Scorpaena notata</i> Rafinesque | 1.69 | 2      | Whole protein hydrolyzate; ribosomal | [3]       |
| EY       | ACE inhibitor | marine Pisces   | Elasmobranchii                     | 2.68 | 2      | Whole protein hydrolyzate; ribosomal | [2]       |

|    |               |                 |                                                 |        |   |                                         |     |
|----|---------------|-----------------|-------------------------------------------------|--------|---|-----------------------------------------|-----|
| FI | ACE inhibitor | marine Pisces   | <i>Scorpaena notata</i><br>Rafinesque           | 1.44   | 2 | Whole protein hydrolyzate;<br>ribosomal | [3] |
| FY | ACE inhibitor | marine algae    | <i>Undaria pinnatifida</i><br>(Harvey) Suringar | 18.8   | 2 | Whole protein hydrolyzate;<br>ribosomal | [4] |
| GP | ACE inhibitor | marine Pisces   | <i>Pollachius pollachius</i><br>Linnaeus        | 252.63 | 2 | Whole protein hydrolyzate;<br>ribosomal | [5] |
| IY | ACE inhibitor | marine Pisces   | <i>Sardina pilchardus</i><br>Walbaum            | 2.1    | 2 | Whole protein hydrolyzate;<br>ribosomal | [6] |
| IY | ACE inhibitor | marine algae    | <i>Undaria pinnatifida</i><br>(Harvey) Suringar | 42.3   | 2 | Whole protein hydrolyzate;<br>ribosomal | [4] |
| KD | antioxidative | marine Pisces   | <i>Katsuwonus pelamis</i><br>Linnaeus           | /      | 2 | Whole protein hydrolyzate;<br>ribosomal | [7] |
| KL | ACE inhibitor | marine algae    | <i>Undaria pinnatifida</i><br>(Harvey) Suringar | 50.2   | 2 | Whole protein hydrolyzate;<br>ribosomal | [8] |
| KP | ACE inhibitor | marine Pisces   | <i>Katsuwonus pelamis</i><br>Linnaeus           | 22     | 2 | Whole protein hydrolyzate;<br>ribosomal | [9] |
| KW | ACE inhibitor | marine Pisces   | <i>Sardina pilchardus</i><br>Walbaum            | 1.63   | 2 | Whole protein hydrolyzate;<br>ribosomal | [6] |
| KY | ACE inhibitor | marine algae    | <i>Undaria pinnatifida</i><br>(Harvey) Suringar | 61     | 2 | Whole protein hydrolyzate;<br>ribosomal | [4] |
| LW | antioxidative | marine Bivalvia | <i>Maetra quadrangularis</i><br>Reeve           | /      | 2 | Whole protein hydrolyzate;<br>ribosomal | [1] |

|    |               |                 |                                                 |        |   |                                            |      |
|----|---------------|-----------------|-------------------------------------------------|--------|---|--------------------------------------------|------|
| LY | ACE inhibitor | marine Pisces   | <i>Sardina pilchardus</i><br>Walbaum            | 18     | 2 | Whole protein<br>hydrolyzate;<br>ribosomal | [6]  |
| MF | ACE inhibitor | marine Pisces   | <i>Sardina pilchardus</i><br>Walbaum            | 45     | 2 | Whole protein<br>hydrolyzate;<br>ribosomal | [6]  |
| MY | ACE inhibitor | marine Pisces   | <i>Sardina pilchardus</i><br>Walbaum            | 193    | 2 | Whole protein<br>hydrolyzate;<br>ribosomal | [6]  |
| MY | antioxidative | marine Pisces   | <i>Sardina pilchardus</i><br>Walbaum            | /      | 2 | Whole protein<br>hydrolyzate;<br>ribosomal | [10] |
| NK | ACE inhibitor | marine algae    | <i>Undaria pinnatifida</i><br>(Harvey) Suringar | 810    | 2 | Whole protein<br>hydrolyzate;<br>ribosomal | [8]  |
| PL | ACE inhibitor | marine Pisces   | <i>Pollachius</i><br><i>pollachius</i> Linnaeus | 337.32 | 2 | Whole protein<br>hydrolyzate;<br>ribosomal | [5]  |
| RY | ACE inhibitor | marine Pisces   | <i>Sardina pilchardus</i><br>Walbaum            | 10.5   | 2 | Whole protein<br>hydrolyzate;<br>ribosomal | [6]  |
| TW | antioxidative | marine Bivalvia | <i>Macra</i><br><i>quadrangularis</i><br>Reeve  | /      | 2 | Whole protein<br>hydrolyzate;<br>ribosomal | [1]  |
| VF | ACE inhibitor | marine Pisces   | <i>Sardina pilchardus</i><br>Walbaum            | 9.2    | 2 | Whole protein<br>hydrolyzate;<br>ribosomal | [6]  |
| VW | antioxidative | marine Bivalvia | <i>Macra</i><br><i>quadrangularis</i><br>Reeve  | /      | 2 | Whole protein<br>hydrolyzate;<br>ribosomal | [1]  |
| YH | ACE inhibitor | marine algae    | <i>Undaria pinnatifida</i><br>(Harvey) Suringar | 35.2   | 2 | Whole protein<br>hydrolyzate;<br>ribosomal | [4]  |

|     |               |                  |                                                 |      |   |                                         |      |
|-----|---------------|------------------|-------------------------------------------------|------|---|-----------------------------------------|------|
| YK  | ACE inhibitor | marine algae     | <i>Undaria pinnatifida</i><br>(Harvey) Suringar | 610  | 2 | Whole protein hydrolyzate;<br>ribosomal | [8]  |
| AEL | ACE inhibitor | freshwater algae | <i>Chlorella vulgaris</i><br>Beijerinck         | /    | 3 | Whole protein hydrolyzate;<br>ribosomal | [11] |
| AFL | ACE inhibitor | freshwater algae | <i>Chlorella vulgaris</i><br>Beijerinck         | /    | 3 | Whole protein hydrolyzate;<br>ribosomal | [11] |
| AKK | ACE inhibitor | marine Pisces    | <i>Sardina pilchardus</i><br>Walbaum            | 3.2  | 3 | Whole protein hydrolyzate;<br>ribosomal | [6]  |
| EAK | antioxidative | marine Pisces    | <i>Katsuwonus pelamis</i><br>Linnaeus           | /    | 3 | Whole protein hydrolyzate;<br>ribosomal | [7]  |
| FAL | ACE inhibitor | freshwater algae | <i>Chlorella vulgaris</i><br>Beijerinck         | 26.3 | 3 | Whole protein hydrolyzate;<br>ribosomal | [12] |
| FAL | ACE inhibitor | freshwater algae | <i>Chlorella vulgaris</i><br>Beijerinck         | /    | 3 | Whole protein hydrolyzate;<br>ribosomal | [11] |
| FKK | antioxidative | marine Crustacea | <i>Penaeus japonicus</i><br>Spence Bate         | /    | 3 | Whole protein hydrolyzate;<br>ribosomal | [13] |
| FQP | ACE inhibitor | marine Pisces    | <i>Katsuwonus pelamis</i><br>Linnaeus           | /    | 3 | Whole protein hydrolyzate;<br>ribosomal | [14] |
| GAH | antioxidative | marine Pisces    | <i>Sardinella aurita</i><br>Valenciennes        | /    | 3 | Whole protein hydrolyzate;<br>ribosomal | [15] |
| GGE | antioxidative | marine Pisces    | <i>Sardinella aurita</i><br>Valenciennes        | /    | 3 | Whole protein hydrolyzate;<br>ribosomal | [15] |

|     |               |                  |                                                 |      |   |                                         |      |
|-----|---------------|------------------|-------------------------------------------------|------|---|-----------------------------------------|------|
| GHF | ACE inhibitor | marine Pisces    | <i>Katsuwonus pelamis</i><br>Linnaeus           | 1001 | 3 | Whole protein hydrolyzate;<br>ribosomal | [8]  |
| GLP | ACE inhibitor | marine Pisces    | <i>Pollachius pollachius</i><br>Linnaeus        | 1.62 | 3 | Whole protein hydrolyzate;<br>ribosomal | [5]  |
| GPL | ACE inhibitor | marine Pisces    | <i>Pollachius pollachius</i><br>Linnaeus        | 2.65 | 3 | Whole protein hydrolyzate;<br>ribosomal | [5]  |
| GRP | ACE inhibitor | marine Pisces    | <i>Sardina pilchardus</i><br>Walbaum            | 19.9 | 3 | Whole protein hydrolyzate;<br>ribosomal | [6]  |
| IAE | ACE inhibitor | freshwater algae | <i>Chlorella vulgaris</i><br>Beijerinck         | 34.7 | 3 | Whole protein hydrolyzate;<br>ribosomal | [12] |
| IAE | ACE inhibitor | freshwater algae | <i>Chlorella vulgaris</i><br>Beijerinck         | /    | 3 | Whole protein hydrolyzate;<br>ribosomal | [11] |
| IFG | ACE inhibitor | marine Pisces    | <i>Thunnus thynnus</i><br>Linnaeus              | 1001 | 3 | Whole protein hydrolyzate;<br>ribosomal | [8]  |
| IKK | antioxidative | marine Crustacea | <i>Penaeus japonicus</i><br>Spence Bate         | /    | 3 | Whole protein hydrolyzate;<br>ribosomal | [13] |
| IKL | antioxidative | marine Pisces    | <i>Katsuwonus pelamis</i><br>Linnaeus           | /    | 3 | Whole protein hydrolyzate;<br>ribosomal | [7]  |
| IKP | ACE inhibitor | marine Pisces    | <i>Katsuwonus pelamis</i><br>Linnaeus           | 6.9  | 3 | Whole protein hydrolyzate;<br>ribosomal | [14] |
| IYK | ACE inhibitor | marine algae     | <i>Undaria pinnatifida</i><br>(Harvey) Suringar | 177  | 3 | Whole protein hydrolyzate;<br>ribosomal | [8]  |

|     |               |                 |                                                           |      |   |                                         |      |
|-----|---------------|-----------------|-----------------------------------------------------------|------|---|-----------------------------------------|------|
| KAI | antioxidative | marine Pisces   | <i>Katsuwonus pelamis</i><br>Linnaeus                     | /    | 3 | Whole protein hydrolyzate;<br>ribosomal | [7]  |
| KFY | ACE inhibitor | marine algae    | <i>Undaria pinnatifida</i><br>(Harvey) Suringar           | 45   | 3 | Whole protein hydrolyzate;<br>ribosomal | [8]  |
| KVI | antioxidative | marine Pisces   | <i>Katsuwonus pelamis</i><br>Linnaeus                     | /    | 3 | Whole protein hydrolyzate;<br>ribosomal | [7]  |
| KYY | ACE inhibitor | marine algae    | <i>Undaria pinnatifida</i><br>(Harvey) Suringar           | 79   | 3 | Whole protein hydrolyzate;<br>ribosomal | [8]  |
| LDY | ACE inhibitor | marine algae    | <i>Palmaria palmata</i><br>(Linnaeus) F.Weber<br>& D.Mohr | 6.1  | 3 | Whole protein hydrolyzate;<br>ribosomal | [16] |
| LDY | antioxidative | marine Bivalvia | <i>Maetra quadrangularis</i><br>Reeve                     | /    | 3 | Whole protein hydrolyzate;<br>ribosomal | [1]  |
| LEQ | ACE inhibitor | marine algae    | <i>Nannochloropsis oculata</i><br>(Droop)<br>D.J.Hibberd  | 173  | 3 | Whole protein hydrolyzate;<br>ribosomal | [17] |
| LGP | ACE inhibitor | marine Pisces   | <i>Pollachius pollachius</i><br>Linnaeus                  | 0.72 | 3 | Whole protein hydrolyzate;<br>ribosomal | [5]  |
| LHY | antioxidative | marine Pisces   | <i>Sardinella aurita</i><br>Valenciennes                  | /    | 3 | Whole protein hydrolyzate;<br>ribosomal | [15] |
| LKL | ACE inhibitor | marine Pisces   | <i>Sardina pilchardus</i><br>Walbaum                      | 188  | 3 | Whole protein hydrolyzate;<br>ribosomal | [18] |
| LPG | ACE inhibitor | marine Pisces   | <i>Pollachius pollachius</i><br>Linnaeus                  | 5.73 | 3 | Whole protein hydrolyzate;<br>ribosomal | [5]  |

|     |               |                 |                                                      |       |   |                                      |      |
|-----|---------------|-----------------|------------------------------------------------------|-------|---|--------------------------------------|------|
| LRY | ACE inhibitor | marine algae    | <i>Pyropia yezoensis</i> (Ueda) M.S.Hwang & H.G.Choi | 5.1   | 3 | Whole protein hydrolyzate; ribosomal | [8]  |
| LRY | ACE inhibitor | marine algae    | <i>Palmaria palmata</i> (Linnaeus) F.Weber & D.Mohr  | 0.04  | 3 | Whole protein hydrolyzate; ribosomal | [16] |
| LTF | ACE inhibitor | marine Pisces   | <i>Thunnus thynnus</i> Linnaeus                      | 330   | 3 | Whole protein hydrolyzate; ribosomal | [8]  |
| LVE | ACE inhibitor | marine Bivalvia | <i>Pinctada fucata</i> Gould                         | 14.2  | 3 | Whole protein hydrolyzate; ribosomal | [19] |
| MKY | ACE inhibitor | marine algae    | <i>Pyropia yezoensis</i> (Ueda) M.S.Hwang & H.G.Choi | 7.3   | 3 | Whole protein hydrolyzate; ribosomal | [8]  |
| NHK | antioxidative | marine Bivalvia | <i>Maetra quadrangularis</i> Reeve                   | /     | 3 | Whole protein hydrolyzate; ribosomal | [1]  |
| NKL | ACE inhibitor | marine algae    | <i>Undaria pinnatifida</i> (Harvey) Suringar         | 88    | 3 | Whole protein hydrolyzate; ribosomal | [8]  |
| PGL | ACE inhibitor | marine Pisces   | <i>Pollachius pollachius</i> Linnaeus                | 13.93 | 3 | Whole protein hydrolyzate; ribosomal | [5]  |
| PLG | ACE inhibitor | marine Pisces   | <i>Pollachius pollachius</i> Linnaeus                | 4.74  | 3 | Whole protein hydrolyzate; ribosomal | [5]  |
| RFH | ACE inhibitor | marine Pisces   | <i>Pollachius pollachius</i> Linnaeus                | 331   | 3 | Whole protein hydrolyzate; ribosomal | [6]  |
| TDY | antioxidative | marine Bivalvia | <i>Maetra quadrangularis</i> Reeve                   | /     | 3 | Whole protein hydrolyzate; ribosomal | [1]  |

|      |               |                    |                                                 |       |   |                                         |      |
|------|---------------|--------------------|-------------------------------------------------|-------|---|-----------------------------------------|------|
| VKL  | antioxidative | marine Pisces      | <i>Katsuwonus pelamis</i><br>Linnaeus           | /     | 3 | Whole protein hydrolyzate;<br>ribosomal | [7]  |
| VKV  | antioxidative | marine Pisces      | <i>Katsuwonus pelamis</i><br>Linnaeus           | /     | 3 | Whole protein hydrolyzate;<br>ribosomal | [7]  |
| YKY  | ACE inhibitor | marine algae       | <i>Undaria pinnatifida</i><br>(Harvey) Suringar | 43.5  | 3 | Whole protein hydrolyzate;<br>ribosomal | [8]  |
| YNK  | ACE inhibitor | marine algae       | <i>Undaria pinnatifida</i><br>(Harvey) Suringar | 125   | 3 | Whole protein hydrolyzate;<br>ribosomal | [8]  |
| AEVG | antioxidative | marine Pisces      | <i>Mustelus griseus</i><br>Pietschmann          | /     | 4 | Whole protein hydrolyzate;<br>ribosomal | [20] |
| AGSP | ACE inhibitor | marine Cephalopoda | <i>Sepia officinalis</i><br>Linnaeus            | 37.2  | 4 | Whole protein hydrolyzate;<br>ribosomal | [21] |
| AGSS | ACE inhibitor | marine Cephalopoda | <i>Sepia officinalis</i><br>Linnaeus            | 672.1 | 4 | Whole protein hydrolyzate;<br>ribosomal | [21] |
| AIYK | ACE inhibitor | marine algae       | <i>Undaria pinnatifida</i><br>(Harvey) Suringar | 810   | 4 | Whole protein hydrolyzate;<br>ribosomal | [8]  |
| FIKK | antioxidative | marine Crustacea   | <i>Penaeus japonicus</i><br>Spence Bate         | /     | 4 | Whole protein hydrolyzate;<br>ribosomal | [13] |
| GAWA | antioxidative | marine Pisces      | <i>Sardinella aurita</i><br>Valenciennes        | /     | 4 | Whole protein hydrolyzate;<br>ribosomal | [15] |
| GDAP | ACE inhibitor | marine Cephalopoda | <i>Sepia officinalis</i><br>Linnaeus            | 22.5  | 4 | Whole protein hydrolyzate;<br>ribosomal | [21] |



|      |               |                  |                                                           |       |   |                                         |      |
|------|---------------|------------------|-----------------------------------------------------------|-------|---|-----------------------------------------|------|
| GWAP | ACE inhibitor | marine Pisces    | <i>Sardinella aurita</i><br>Valenciennes                  | 3.86  | 4 | Whole protein hydrolyzate;<br>ribosomal | [15] |
| IAPG | ACE inhibitor | freshwater algae | <i>Chlorella vulgaris</i><br>Beijerinck                   | 11.4  | 4 | Whole protein hydrolyzate;<br>ribosomal | [12] |
| IAPG | ACE inhibitor | marine algae     | <i>Arthrospira platensis</i><br>Gomont                    | 11.4  | 4 | Whole protein hydrolyzate;<br>ribosomal | [12] |
| IAPG | ACE inhibitor | freshwater algae | <i>Chlorella vulgaris</i><br>Beijerinck                   | 11.4  | 4 | Whole protein hydrolyzate;<br>ribosomal | [22] |
| ILAP | antidiabetic  | marine algae     | <i>Palmaria palmata</i><br>(Linnaeus) F.Weber<br>& D.Mohr | 43.46 | 4 | Whole protein hydrolyzate;<br>ribosomal | [23] |
| IVVE | ACE inhibitor | freshwater algae | <i>Chlorella vulgaris</i><br>Beijerinck                   | 315.3 | 4 | Whole protein hydrolyzate;<br>ribosomal | [22] |
| KFYG | ACE inhibitor | marine algae     | <i>Undaria pinnatifida</i><br>(Harvey) Suringar           | 610   | 4 | Whole protein hydrolyzate;<br>ribosomal | [8]  |
| KFYG | ACE inhibitor | marine algae     | <i>Undaria pinnatifida</i><br>(Harvey) Suringar           | 21    | 4 | Whole protein hydrolyzate;<br>ribosomal | [24] |
| LARL | antioxidative | marine Pisces    | <i>Sardinella aurita</i><br>Valenciennes                  | /     | 4 | Whole protein hydrolyzate;<br>ribosomal | [15] |
| LLAP | antidiabetic  | marine algae     | <i>Palmaria palmata</i><br>(Linnaeus) F.Weber<br>& D.Mohr | 53.67 | 4 | Whole protein hydrolyzate;<br>ribosomal | [16] |
| LVSK | antioxidative | marine Bivalvia  | <i>Maetra quadrangularis</i><br>Reeve                     | /     | 4 | Whole protein hydrolyzate;<br>ribosomal | [1]  |

|      |                  |                  |                                                           |       |   |                                         |      |
|------|------------------|------------------|-----------------------------------------------------------|-------|---|-----------------------------------------|------|
| MEMK | antioxidative    | marine Bivalvia  | <i>Maetra quadrangularis</i><br>Reeve                     | /     | 4 | Whole protein hydrolyzate;<br>ribosomal | [1]  |
| MPDW | immunomodulating | marine algae     | <i>Nannochloropsis oculata</i> (Droop)<br>D.J.Hibberd     | /     | 4 | Whole protein hydrolyzate;<br>ribosomal | [25] |
| NIGK | antithrombotic   | marine algae     | <i>Palmaria palmata</i><br>(Linnaeus) F.Weber<br>& D.Mohr | /     | 4 | Whole protein hydrolyzate;<br>ribosomal | [7]  |
| PAGE | antioxidative    | marine Pisces    | <i>Thunnus thynnus</i><br>Linnaeus                        | /     | 4 | Whole protein hydrolyzate;<br>ribosomal | [26] |
| PHYL | antioxidative    | marine Pisces    | <i>Sardinella aurita</i><br>Valenciennes                  | /     | 4 | Whole protein hydrolyzate;<br>ribosomal | [15] |
| PKAV | antioxidative    | marine Pisces    | <i>Katsuwonus pelamis</i><br>Linnaeus                     | /     | 4 | Whole protein hydrolyzate;<br>ribosomal | [7]  |
| VDYP | antioxidative    | marine Pisces    | <i>Thunnus albacares</i><br>Bonnaterre                    | /     | 4 | Whole protein hydrolyzate;<br>ribosomal | [26] |
| VEGY | ACE inhibitor    | freshwater algae | <i>Chlorella vulgaris</i><br>Beijerinck                   | 128.4 | 4 | Whole protein hydrolyzate;<br>ribosomal | [22] |
| VGEY | ACE inhibitor    | freshwater algae | <i>Chlorella ellipsoidea</i><br>Gerneck                   | 128.4 | 4 | Whole protein hydrolyzate;<br>ribosomal | [11] |
| VVKL | antioxidative    | marine Pisces    | <i>Katsuwonus pelamis</i><br>Linnaeus                     | /     | 4 | Whole protein hydrolyzate;<br>ribosomal | [7]  |
| VWIG | ACE inhibitor    | marine Pisces    | <i>Thunnus thynnus</i><br>Linnaeus                        | 110   | 4 | Whole protein hydrolyzate;<br>ribosomal | [12] |

|       |               |                    |                                              |       |   |                                      |         |
|-------|---------------|--------------------|----------------------------------------------|-------|---|--------------------------------------|---------|
| YKYY  | ACE inhibitor | marine algae       | <i>Undaria pinnatifida</i> (Harvey) Suringar | 64.2  | 4 | Whole protein hydrolyzate; ribosomal | [8]     |
| YKYY  | ACE inhibitor | marine algae       | <i>Undaria pinnatifida</i> (Harvey) Suringar | 90.5  | 4 | Whole protein hydrolyzate; ribosomal | [24]    |
| YNKL  | ACE inhibitor | marine algae       | <i>Undaria pinnatifida</i> (Harvey) Suringar | 64.2  | 4 | Whole protein hydrolyzate; ribosomal | [24]    |
| YRPY  | ACE inhibitor | marine Pisces      | <i>Pollachius pollachius</i> Linnaeus        | 320   | 4 | Whole protein hydrolyzate; ribosomal | [8]     |
| ALPHA | ACE inhibitor | marine Pisces      | <i>Katsuwonus pelamis</i> Linnaeus           | 10    | 5 | Whole protein hydrolyzate; ribosomal | [14]    |
| ALSAF | antioxidative | marine Bivalvia    | <i>Macra quadrangularis</i> Reeve            | /     | 5 | Whole protein hydrolyzate; ribosomal | [1]     |
| BELYP | ACE inhibitor | marine Cephalopoda | <i>Sepia officinalis</i> Linnaeus            | 5.22  | 5 | Whole protein hydrolyzate; ribosomal | [21]    |
| FDEQE | antioxidative | marine Bivalvia    | <i>Macra quadrangularis</i> Reeve            | /     | 5 | Whole protein hydrolyzate; ribosomal | [1]     |
| FGHPY | antioxidative | marine Bivalvia    | <i>Mytilus edulis</i> Linnaeus               | /     | 5 | Whole protein hydrolyzate; ribosomal | [27]    |
| FQPSF | ACE inhibitor | marine Pisces      | <i>Raja clavata</i> Linnaeus                 | 12.56 | 5 | Whole protein hydrolyzate; ribosomal | [27/28] |
| FVAGK | antioxidative | marine Pisces      | <i>Katsuwonus pelamis</i> Linnaeus           | /     | 5 | Whole protein hydrolyzate; ribosomal | [7]     |

|       |                  |                 |                                                                                                         |       |   |                                         |      |
|-------|------------------|-----------------|---------------------------------------------------------------------------------------------------------|-------|---|-----------------------------------------|------|
| GAERP | antioxidative    | marine Pisces   | <i>Mustelus griseus</i><br>Pietschmann                                                                  | /     | 5 | Whole protein hydrolyzate;<br>ribosomal | [20] |
| IITNW | ACE inhibitor    | marine Pisces   | <i>Raja clavata</i><br>Linnaeus                                                                         | 30.96 | 5 | Whole protein hydrolyzate;<br>ribosomal | [28] |
| IWHHT | ACE inhibitor    | marine Pisces   | <i>Katsuwonus pelamis</i><br>Linnaeus                                                                   | 5.8   | 5 | Whole protein hydrolyzate;<br>ribosomal | [14] |
| IYEGY | ACE inhibitor    | marine Pisces   | <i>Raja clavata</i><br>Linnaeus                                                                         | 79.42 | 5 | Whole protein hydrolyzate;<br>ribosomal | [28] |
| LKYPI | ACE inhibitor    | marine Pisces   | <i>Raja clavata</i><br>Linnaeus                                                                         | 27.07 | 5 | Whole protein hydrolyzate;<br>ribosomal | [28] |
| LYEGY | antioxidative    | marine Bivalvia | <i>Maetra quadrangularis</i><br>Reeve                                                                   | /     | 5 | Whole protein hydrolyzate;<br>ribosomal | [1]  |
| MILMR | antioxidative    | marine Pisces   | <i>Larimichthys crocea</i><br>Richardson                                                                | /     | 5 | Whole protein hydrolyzate;<br>ribosomal | [29] |
| MMLDF | immunomodulating | marine algae    | <i>Limnospira maxima</i><br>(Setchell &<br>N.L.Gardner)<br>Nowicka-Krawczyk,<br>Mühlsteinová &<br>Hauer | /     | 5 | Whole protein hydrolyzate;<br>ribosomal | [30] |
| MMLDF | ACE inhibitor    | marine algae    | <i>Limnospira maxima</i><br>(Setchell &<br>N.L.Gardner)<br>Nowicka-Krawczyk,<br>Mühlsteinová &<br>Hauer | /     | 5 | Whole protein hydrolyzate;<br>ribosomal | [30] |

|        |               |                  |                                          |       |   |                                         |      |
|--------|---------------|------------------|------------------------------------------|-------|---|-----------------------------------------|------|
| TEFTK  | antioxidative | marine Bivalvia  | <i>Maetra quadrangularis</i><br>Reeve    | /     | 5 | Whole protein hydrolyzate;<br>ribosomal | [1]  |
| TERGY  | antioxidative | marine Bivalvia  | <i>Maetra quadrangularis</i><br>Reeve    | /     | 5 | Whole protein hydrolyzate;<br>ribosomal | [1]  |
| TLKYP  | ACE inhibitor | marine Pisces    | <i>Raja clavata</i><br>Linnaeus          | 170   | 5 | Whole protein hydrolyzate;<br>ribosomal | [28] |
| VLVEE  | antioxidative | marine Pisces    | <i>Larimichthys crocea</i><br>Richardson | /     | 5 | Whole protein hydrolyzate;<br>ribosomal | [29] |
| VPSGK  | antioxidative | marine Pisces    | <i>Katsuwonus pelamis</i><br>Linnaeus    | /     | 5 | Whole protein hydrolyzate;<br>ribosomal | [7]  |
| VVPPA  | ACE inhibitor | freshwater algae | <i>Chlorella vulgaris</i><br>Beijerinck  | 79.5  | 5 | Whole protein hydrolyzate;<br>ribosomal | [22] |
| YLMSR  | antioxidative | marine Pisces    | <i>Larimichthys crocea</i><br>Richardson | /     | 5 | Whole protein hydrolyzate;<br>ribosomal | [29] |
| DYGLYP | ACE inhibitor | marine Pisces    | <i>Katsuwonus pelamis</i><br>Linnaeus    | 62    | 6 | Whole protein hydrolyzate;<br>ribosomal | [14] |
| ESAGIH | ACE inhibitor | marine Pisces    | <i>Raja clavata</i><br>Linnaeus          | 371.6 | 6 | Whole protein hydrolyzate;<br>ribosomal | [28] |
| FHNMEK | antioxidative | marine Bivalvia  | <i>Maetra quadrangularis</i><br>Reeve    | /     | 6 | Whole protein hydrolyzate;<br>ribosomal | [1]  |
| GALAAH | antioxidative | marine Pisces    | <i>Sardinella aurita</i><br>Valenciennes | /     | 6 | Whole protein hydrolyzate;<br>ribosomal | [15] |

|        |                  |                    |                                                                                                   |       |   |                                         |      |
|--------|------------------|--------------------|---------------------------------------------------------------------------------------------------|-------|---|-----------------------------------------|------|
| GVYPHK | ACE inhibitor    | marine Pisces      | <i>Katsuwonus pelamis</i><br>Linnaeus                                                             | /     | 6 | Whole protein hydrolyzate;<br>ribosomal | [31] |
| HMPVTK | antioxidative    | marine Bivalvia    | <i>Maetra quadrangularis</i><br>Reeve                                                             | /     | 6 | Whole protein hydrolyzate;<br>ribosomal | [1]  |
| IKPLNY | ACE inhibitor    | marine Pisces      | <i>Katsuwonus pelamis</i><br>Linnaeus                                                             | 43    | 6 | Whole protein hydrolyzate;<br>ribosomal | [14] |
| IVGRPR | ACE inhibitor    | marine Pisces      | <i>Raja clavata</i><br>Linnaeus                                                                   | 1000  | 6 | Whole protein hydrolyzate;<br>ribosomal | [28] |
| KNGDGY | ACE inhibitor    | marine Cephalopoda | <i>Sepia officinalis</i><br>Linnaeus                                                              | 51.63 | 6 | Whole protein hydrolyzate;<br>ribosomal | [32] |
| LDAVNR | immunomodulating | marine algae       | <i>Limnospira maxima</i><br>(Setchell & N.L.Gardner)<br>Nowicka-Krawczyk,<br>Mühlsteinová & Hauer | /     | 6 | Whole protein hydrolyzate;<br>ribosomal | [30] |
| LDAVNR | ACE inhibitor    | marine algae       | <i>Limnospira maxima</i><br>(Setchell & N.L.Gardner)<br>Nowicka-Krawczyk,<br>Mühlsteinová & Hauer | /     | 6 | Whole protein hydrolyzate;<br>ribosomal | [30] |
| LNGDVW | antioxidative    | freshwater algae   | <i>Chlorella ellipsoidea</i><br>Gerneck                                                           | /     | 6 | Whole protein hydrolyzate;<br>ribosomal | [11] |
| LPHSGY | antioxidative    | marine Pisces      | <i>Gadus chalcogrammus</i><br>Pallas                                                              | /     | 6 | Whole protein hydrolyzate;<br>ribosomal | [33] |

|         |                  |                    |                                                           |       |   |                                         |      |
|---------|------------------|--------------------|-----------------------------------------------------------|-------|---|-----------------------------------------|------|
| PHHADS  | antioxidative    | marine Pisces      | <i>Thunnus albacares</i><br>Bonnaterre                    | /     | 6 | Whole protein hydrolyzate;<br>ribosomal | [26] |
| PKAVHE  | antioxidative    | marine Pisces      | <i>Thunnus albacares</i><br>Bonnaterre                    | /     | 6 | Whole protein hydrolyzate;<br>ribosomal | [26] |
| RSIKGF  | ACE inhibitor    | marine Cephalopoda | <i>Sepia officinalis</i><br>Linnaeus                      | 32.74 | 6 | Whole protein hydrolyzate;<br>ribosomal | [32] |
| STHGVY  | ACE inhibitor    | marine Cephalopoda | <i>Sepia officinalis</i><br>Linnaeus                      | 19.3  | 6 | Whole protein hydrolyzate;<br>ribosomal | [32] |
| WDDMEK  | antioxidative    | marine Bivalvia    | <i>Maetra quadrangularis</i><br>Reeve                     | /     | 6 | Whole protein hydrolyzate;<br>ribosomal | [1]  |
| YALPHA  | ACE inhibitor    | marine Cephalopoda | <i>Todarodes pacificus</i><br>Steenstrup                  | 9.8   | 6 | Whole protein hydrolyzate;<br>ribosomal | [34] |
| ASFSPWG | immunomodulatory | marine Crustacea   | <i>Penaeus vannamei</i><br>Boone                          | /     | 6 | Whole protein hydrolyzate;<br>ribosomal | [35] |
| DMIPAQK | ACE inhibitor    | marine Pisces      | <i>Katsuwonus pelamis</i><br>Linnaeus                     | 45    | 7 | Whole protein hydrolyzate;<br>ribosomal | [14] |
| EKSYELP | ACE inhibitor    | marine Cephalopoda | <i>Sepia officinalis</i><br>Linnaeus                      | 14.41 | 7 | Whole protein hydrolyzate;<br>ribosomal | [32] |
| FEQDWAS | ACE inhibitor    | marine algae       | <i>Palmaria palmata</i><br>(Linnaeus) F.Weber<br>& D.Mohr | 2.8   | 7 | Whole protein hydrolyzate;<br>ribosomal | [16] |
| GIHETTY | ACE inhibitor    | marine Cephalopoda | <i>Sepia officinalis</i><br>Linnaeus                      | 25.66 | 7 | Whole protein hydrolyzate;<br>ribosomal | [32] |

|         |                  |                    |                                                           |        |   |                                         |      |
|---------|------------------|--------------------|-----------------------------------------------------------|--------|---|-----------------------------------------|------|
| GMNNLTP | ACE inhibitor    | marine algae       | <i>Nannochloropsis oculata</i> (Droop)<br>D.J.Hibberd     | 123    | 7 | Whole protein hydrolyzate;<br>ribosomal | [17] |
| GWNQWFL | antioxidative    | marine algae       | <i>Navicula salinicola</i><br>Hustedt                     | /      | 7 | Whole protein hydrolyzate;<br>ribosomal | [36] |
| GYALPHA | ACE inhibitor    | marine Cephalopoda | <i>Todarodes pacificus</i><br>Steenstrup                  | 27.3   | 7 | Whole protein hydrolyzate;<br>ribosomal | [34] |
| HFGDPFH | antioxidative    | marine Bivalvia    | <i>Mytilus edulis</i><br>Linnaeus                         | /      | 7 | Whole protein hydrolyzate;<br>ribosomal | [37] |
| HGPLGPL | antioxidative    | marine Pisces      | <i>Johnius belangerii</i><br>Cuvier                       | /      | 7 | Whole protein hydrolyzate;<br>ribosomal | [38] |
| LGPLGHQ | ACE inhibitor    | marine Pisces      | <i>Okamejei kenojei</i><br>Müller & Henle                 | 4.22   | 7 | Whole protein hydrolyzate;<br>ribosomal | [39] |
| MAGVDHI | antidiabetic     | marine algae       | <i>Palmaria palmata</i><br>(Linnaeus) F.Weber<br>& D.Mohr | 159.37 | 7 | Whole protein hydrolyzate;<br>ribosomal | [23] |
| NGLEGLK | antioxidative    | marine Cephalopoda | <i>Dosidicus gigas</i><br>d'Orbigny                       | /      | 7 | Whole protein hydrolyzate;<br>ribosomal | [37] |
| PMDYMVT | antioxidative    | marine Pisces      | <i>Thunnus tonggol</i><br>Bleeker                         | /      | 7 | Whole protein hydrolyzate;<br>ribosomal | [40] |
| PMDYMVT | immunomodulating | marine Pisces      | <i>Thunnus tonggol</i><br>Bleeker                         | /      | 7 | Whole protein hydrolyzate;<br>ribosomal | [40] |
| SHDAHPE | antioxidative    | marine Pisces      | <i>Thunnus albacares</i><br>Bonnaterre                    | /      | 7 | Whole protein hydrolyzate;<br>ribosomal | [26] |



|          |                  |                    |                                                   |       |   |                                         |      |
|----------|------------------|--------------------|---------------------------------------------------|-------|---|-----------------------------------------|------|
| VDHDHPE  | antioxidative    | marine Pisces      | <i>Thunnus albacares</i><br>Bonnaterre            | /     | 7 | Whole protein hydrolyzate;<br>ribosomal | [26] |
| VPAAPPK  | ACE inhibitor    | marine Pisces      | <i>Channa striata</i><br>Bloch                    | 0.45  | 7 | Whole protein hydrolyzate;<br>ribosomal | [41] |
| WPRGYFL  | ACE inhibitor    | freshwater algae   | <i>Tetradesmus obliquus</i> (Turpin)<br>M.J.Wynne | /     | 7 | Whole protein hydrolyzate;<br>ribosomal | [42] |
| WPRGYFL  | antioxidative    | freshwater algae   | <i>Tetradesmus obliquus</i> (Turpin)<br>M.J.Wynne | /     | 7 | Whole protein hydrolyzate;<br>ribosomal | [42] |
| AFVGYVLP | ACE inhibitor    | marine Cephalopoda | <i>Sepia officinalis</i><br>Linnaeus              | 18.02 | 8 | Whole protein hydrolyzate;<br>ribosomal | [32] |
| ASFSPWGG | immunomodulatory | marine Crustacea   | <i>Penaeus vannamei</i><br>Boone                  | /     | 8 | Whole protein hydrolyzate;<br>ribosomal | [35] |
| FGASTRGA | ACE inhibitor    | marine Pisces      | <i>Gadus chalcogrammus</i><br>Pallas              | 14.7  | 8 | Whole protein hydrolyzate;<br>ribosomal | [43] |
| GEREANVM | antioxidative    | marine Pisces      | <i>Mustelus griseus</i><br>Pietschmann            | /     | 8 | Whole protein hydrolyzate;<br>ribosomal | [20] |
| LQPGQGQQ | antioxidative    | marine Pisces      | <i>Sardina pilchardus</i><br>Walbaum              | /     | 8 | Whole protein hydrolyzate;<br>ribosomal | [44] |
| NGTWFEPP | ACE inhibitor    | marine Pisces      | <i>Channa striata</i><br>Bloch                    | 0.63  | 8 | Whole protein hydrolyzate;<br>ribosomal | [41] |
| PSHDAHPE | antioxidative    | marine Pisces      | <i>Thunnus albacares</i><br>Bonnaterre            | /     | 8 | Whole protein hydrolyzate;<br>ribosomal | [26] |

|           |                  |                    |                                       |       |   |                                      |            |
|-----------|------------------|--------------------|---------------------------------------|-------|---|--------------------------------------|------------|
| PTHIKWGD  | ACE inhibitor    | marine Pisces      | <i>Thunnus thynnus</i><br>Linnaeus    | 1.5   | 8 | Whole protein hydrolyzate; ribosomal | [45], [46] |
| SFHPYFSY  | ACE inhibitor    | marine Cephalopoda | <i>Sepia officinalis</i><br>Linnaeus  | 82.71 | 8 | Whole protein hydrolyzate; ribosomal | [32]       |
| VEGKSPNV  | antioxidative    | marine Pisces      | <i>Scorpaena notata</i><br>Rafinesque | /     | 8 | Whole protein hydrolyzate; ribosomal | [3]        |
| VEGKSPNV  | ACE inhibitor    | marine Pisces      | <i>Scorpaena notata</i><br>Rafinesque | /     | 8 | Whole protein hydrolyzate; ribosomal | [3]        |
| WHNVSGSP  | antioxidative    | marine Bivalvia    | <i>Macra quadrangularis</i><br>Reeve  | /     | 8 | Whole protein hydrolyzate; ribosomal | [1]        |
| YSEMPPGK  | antioxidative    | marine Bivalvia    | <i>Macra quadrangularis</i><br>Reeve  | /     | 8 | Whole protein hydrolyzate; ribosomal | [1]        |
| YWVTSGPK  | antioxidative    | marine Bivalvia    | <i>Macra quadrangularis</i><br>Reeve  | /     | 8 | Whole protein hydrolyzate; ribosomal | [1]        |
| APSGFLGMR | immunomodulatory | marine Crustacea   | <i>Penaeus vannamei</i><br>Boone      | /     | 9 | Whole protein hydrolyzate; ribosomal | [35]       |
| FDSGPAGVL | antioxidative    | marine Cephalopoda | <i>Dosidicus gigas</i><br>d'Orbigny   | /     | 9 | Whole protein hydrolyzate; ribosomal | [47]       |
| GQKSVPEVR | antioxidative    | marine Pisces      | <i>Scorpaena notata</i><br>Rafinesque | /     | 9 | Whole protein hydrolyzate; ribosomal | [3]        |
| GQKSVPEVR | ACE inhibitor    | marine Pisces      | <i>Scorpaena notata</i><br>Rafinesque | /     | 9 | Whole protein hydrolyzate; ribosomal | [3]        |

|            |                  |                             |                                                |      |    |                                         |      |
|------------|------------------|-----------------------------|------------------------------------------------|------|----|-----------------------------------------|------|
| IVGRPRHQG  | ACE inhibitor    | marine Pisces               | <i>Katsuwonus pelamis</i><br>Linnaeus          | 2.4  | 9  | Whole protein hydrolyzate;<br>ribosomal | [14] |
| LGLNGDDVN  | antioxidative    | marine Pisces               | <i>Conger myriaster</i><br>Brevoort            | /    | 9  | Whole protein hydrolyzate;<br>ribosomal | [48] |
| LPTSEAAKY  | antioxidative    | marine Pisces               | <i>Thunnus tonggol</i><br>Bleeker              | /    | 9  | Whole protein hydrolyzate;<br>ribosomal | [40] |
| LPTSEAAKY  | immunomodulating | marine Pisces               | <i>Thunnus tonggol</i><br>Bleeker              | /    | 9  | Whole protein hydrolyzate;<br>ribosomal | [40] |
| MIFPGGPQL  | ACE inhibitor    | marine Pisces               | <i>Limanda aspera</i><br>Pallas                | 22.3 | 9  | Whole protein hydrolyzate;<br>ribosomal | [49] |
| MVGSAPGVL  | ACE inhibitor    | marine Pisces               | <i>Okamejei kenojei</i><br>Müller & Henle      | 3.09 | 9  | Whole protein hydrolyzate;<br>ribosomal | [39] |
| PGPLGLTGP  | ACE inhibitor    | marine Pisces               | <i>Okamejei kenojei</i><br>Müller & Henle      | 95   | 9  | Whole protein hydrolyzate;<br>ribosomal | [50] |
| VAMVPPFET  | antioxidative    | marine Bivalvia             | <i>Maetra quadrangularis</i><br>Reeve          | /    | 9  | Whole protein hydrolyzate;<br>ribosomal | [1]  |
| VEVLPPAEL  | antioxidative    | marine algae                | <i>Navicula salinicola</i><br>Hustedt          | /    | 9  | Whole protein hydrolyzate;<br>ribosomal | [36] |
| APSGFLGMRG | immunomodulatory | marine Crustacea            | <i>Penaeus vannamei</i><br>Boone               | /    | 10 | Whole protein hydrolyzate;<br>ribosomal | [35] |
| DLGLGLPGAH | antioxidative    | marine animal<br>(Rotifera) | <i>Brachionus rotundiformis</i><br>Tschugunoff | /    | 10 | Whole protein hydrolyzate;<br>ribosomal | [51] |

|             |                  |                          |                                                   |      |    |                                      |      |
|-------------|------------------|--------------------------|---------------------------------------------------|------|----|--------------------------------------|------|
| LLGPGLTNHA  | antioxidative    | marine animal (Rotifera) | <i>Brachionus rotundiformis</i><br>Tschugunoff    | /    | 10 | Whole protein hydrolyzate; ribosomal | [51] |
| PTAEGVYMVT  | immunomodulating | marine Pisces            | <i>Thunnus tonggol</i><br>Bleeker                 | 8.8  | 10 | Whole protein hydrolyzate; ribosomal | [52] |
| RPDFLEPPY   | antioxidative    | marine Pisces            | <i>Limanda aspera</i><br>Pallas                   | /    | 10 | Whole protein hydrolyzate; ribosomal | [53] |
| WYGPDRPKFL  | ACE inhibitor    | freshwater algae         | <i>Tetradismus obliquus</i> (Turpin)<br>M.J.Wynne | /    | 10 | Whole protein hydrolyzate; ribosomal | [42] |
| WYGPDRPKFL  | antioxidative    | freshwater algae         | <i>Tetradismus obliquus</i> (Turpin)<br>M.J.Wynne | /    | 10 | Whole protein hydrolyzate; ribosomal | [42] |
| GPDRPKFLGPF | ACE inhibitor    | freshwater algae         | <i>Tetradismus obliquus</i> (Turpin)<br>M.J.Wynne | /    | 11 | Whole protein hydrolyzate; ribosomal | [42] |
| GPDRPKFLGPF | antioxidative    | freshwater algae         | <i>Tetradismus obliquus</i> (Turpin)<br>M.J.Wynne | /    | 11 | Whole protein hydrolyzate; ribosomal | [42] |
| LNLPTAVYMVT | antioxidative    | marine Pisces            | <i>Thunnus obesus</i><br>Lowe                     | /    | 11 | Whole protein hydrolyzate; ribosomal | [54] |
| MIFPGAGGPEL | ACE inhibitor    | marine Pisces            | <i>Limanda aspera</i><br>Pallas                   | 0.03 | 11 | Whole protein hydrolyzate; ribosomal | [12] |
| VECYGPNRPQF | antioxidative    | freshwater algae         | <i>Chlorella vulgaris</i><br>Beijerinck           | /    | 11 | Whole protein hydrolyzate; ribosomal | [55] |
| VECYGPNRPQF | immunomodulating | freshwater algae         | <i>Chlorella vulgaris</i><br>Beijerinck           | /    | 11 | Whole protein hydrolyzate; ribosomal | [55] |

|               |                |                       |                                                           |       |    |                                            |      |
|---------------|----------------|-----------------------|-----------------------------------------------------------|-------|----|--------------------------------------------|------|
| VECYGPNRPQF   | antithrombotic | freshwater algae      | <i>Chlorella vulgaris</i><br>Beijerinck                   | /     | 11 | Whole protein<br>hydrolyzate;<br>ribosomal | [55] |
| VECYGPNRPQF   | ACE inhibitor  | freshwater algae      | <i>Chlorella vulgaris</i><br>Beijerinck                   | 29.6  | 11 | Whole protein<br>hydrolyzate;<br>ribosomal | [55] |
| NGPLQAGQPGER  | antioxidative  | marine<br>Cephalopoda | <i>Dosidicus gigas</i><br>d'Orbigny                       | /     | 12 | Whole protein<br>hydrolyzate;<br>ribosomal | [47] |
| QQPHSRKGFPGP  | antioxidative  | marine Pisces         | <i>Scorpaena notata</i><br>Rafinesque                     | /     | 12 | Whole protein<br>hydrolyzate;<br>ribosomal | [3]  |
| QQPHSRKGFPGP  | ACE inhibitor  | marine Pisces         | <i>Scorpaena notata</i><br>Rafinesque                     | /     | 12 | Whole protein<br>hydrolyzate;<br>ribosomal | [3]  |
| SPGSSGPQGFTG  | antidiabetic   | marine Pisces         | <i>Hippoglossus</i><br><i>stenolepis</i> Schmidt          | 101.6 | 12 | Whole protein<br>hydrolyzate;<br>ribosomal | [56] |
| CAYQWQRPVDRIR | antidiabetic   | marine Pisces         | <i>Thunnus albacares</i><br>Bonnaterre                    | 78    | 13 | Whole protein<br>hydrolyzate;<br>ribosomal | [57] |
| IPGDPGPPGPPGP | antidiabetic   | marine Pisces         | <i>Oreochromis</i><br><i>niloticus</i> Linnaeus           | 65.4  | 13 | Whole protein<br>hydrolyzate;<br>ribosomal | [56] |
| IRLIIVLMPILMA | ACE inhibitor  | marine algae          | <i>Palmaria palmata</i><br>(Linnaeus) F.Weber<br>& D.Mohr | 3300  | 13 | Whole protein<br>hydrolyzate;<br>ribosomal | [58] |
| IRLIIVLMPILMA | antioxidative  | marine algae          | <i>Palmaria palmata</i><br>(Linnaeus) F.Weber<br>& D.Mohr | /     | 13 | Whole protein<br>hydrolyzate;<br>ribosomal | [58] |
| LKQELEDLLEKQE | antioxidative  | marine Bivalvia       | <i>Crassostrea gigas</i><br>Thunberg                      | /     | 13 | Whole protein<br>hydrolyzate;<br>ribosomal | [59] |

|                  |                  |                    |                                        |       |    |                                      |      |
|------------------|------------------|--------------------|----------------------------------------|-------|----|--------------------------------------|------|
| LPGERGRPGAPGP    | antidiabetic     | marine Pisces      | <i>Oreochromis niloticus</i> Linnaeus  | 76.8  | 13 | Whole protein hydrolyzate; ribosomal | [56] |
| NADFGLNGLEGLA    | antioxidative    | marine Cephalopoda | <i>Dosidicus gigas</i> d'Orbigny       | /     | 13 | Whole protein hydrolyzate; ribosomal | [60] |
| PACGGFWISGRPG    | antidiabetic     | marine Pisces      | <i>Thunnus albacares</i> Bonnaterre    | 96.4  | 13 | Whole protein hydrolyzate; ribosomal | [57] |
| VKAGFAWTANQQLS   | antioxidative    | marine Pisces      | <i>Thunnus albacares</i> Bonnaterre    | /     | 14 | Whole protein hydrolyzate; ribosomal | [61] |
| GPLGLLGFLGPLGLS  | antioxidative    | marine Cephalopoda | <i>Dosidicus gigas</i> d'Orbigny       | /     | 15 | Whole protein hydrolyzate; ribosomal | [62] |
| GPLGLLGFLGPLGLS  | ACE inhibitor    | marine Cephalopoda | <i>Dosidicus gigas</i> d'Orbigny       | 90.03 | 15 | Whole protein hydrolyzate; ribosomal | [62] |
| GPVGPAGNPGANGLN  | antidiabetic     | marine Pisces      | <i>Hippoglossus stenolepis</i> Schmidt | 81.3  | 15 | Whole protein hydrolyzate; ribosomal | [56] |
| PGVGGPLGPIGPCYE  | antidiabetic     | marine Pisces      | <i>Thunnus albacares</i> Bonnaterre    | 116.1 | 15 | Whole protein hydrolyzate; ribosomal | [57] |
| RVAPEEHPVEGRYLV  | immunomodulating | marine Bivalvia    | <i>Cyclina sinensis</i> Gmelin         | /     | 15 | Whole protein hydrolyzate; ribosomal | [63] |
| TDGSEDYGILEIDSR  | antithrombotic   | marine Pisces      | <i>Limanda aspera</i> Pallas           | /     | 15 | Whole protein hydrolyzate; ribosomal | [64] |
| ESTVPERTHPACPDFN | antioxidative    | marine Pisces      | <i>Johnius belangerii</i> Cuvier       | /     | 16 | Whole protein hydrolyzate; ribosomal | [65] |

|                            |                  |                             |                                              |       |    |                                      |      |
|----------------------------|------------------|-----------------------------|----------------------------------------------|-------|----|--------------------------------------|------|
| GPKGDRGLPGPPGRDG           | antidiabetic     | marine Pisces               | <i>Oreochromis niloticus</i> Linnaeus        | 89.6  | 16 | Whole protein hydrolyzate; ribosomal | [56] |
| PPGPTGPRGQPGNIGF           | antidiabetic     | marine Pisces               | <i>Hippoglossus stenolepis</i> Schmidt       | 146.7 | 16 | Whole protein hydrolyzate; ribosomal | [56] |
| KWCFRVCYRGICYRRCR          | immunomodulating | marine animal (Xiphosurida) | <i>Limulus</i> O.F. Müller                   | /     | 17 | Whole protein hydrolyzate; ribosomal | [66] |
| RWCFRVCYRGICYRRCR          | immunomodulating | marine animal (Xiphosurida) | <i>Limulus</i> O.F. Müller                   | /     | 17 | Whole protein hydrolyzate; ribosomal | [66] |
| EADIDGDGQVNYEEFVAMMSK      | antithrombotic   | marine Bivalvia             | <i>Mytilus edulis</i> Linnaeus               | /     | 22 | Whole protein hydrolyzate; ribosomal | [67] |
| GWGSFFKKAHVKGKVGKAALTHYLG  | antimicrobial    | marine Pisces               | <i>Pseudopleuronectes americanus</i> Walbaum | 2.5   | 26 | Whole protein hydrolyzate; ribosomal | [68] |
| GWGSFFKKAHVKGKVGKAALTHYLG  | immunomodulating | marine Pisces               | <i>Pseudopleuronectes americanus</i> Walbaum | 2.5   | 26 | Whole protein hydrolyzate; ribosomal | [68] |
| RWRSFFKKAHRGKHVKGKRARTHYLG | antimicrobial    | marine Pisces               | <i>Pseudopleuronectes americanus</i> Walbaum | 5     | 26 | Whole protein hydrolyzate; ribosomal | [68] |
| RWRSFFKKAHRGKHVKGKRARTHYLG | immunomodulating | marine Pisces               | <i>Pseudopleuronectes americanus</i> Walbaum | 5     | 26 | Whole protein hydrolyzate; ribosomal | [68] |
| SWSSFFKKAHSGKHVGKSASTHYLG  | antimicrobial    | marine Pisces               | <i>Pseudopleuronectes americanus</i> Walbaum | 10    | 26 | Whole protein hydrolyzate; ribosomal | [68] |
| SWSSFFKKAHSGKHVGKSASTHYLG  | immunomodulating | marine Pisces               | <i>Pseudopleuronectes americanus</i> Walbaum | 10    | 26 | Whole protein hydrolyzate; ribosomal | [68] |

|                                              |                  |                 |                                           |   |    |                                            |      |
|----------------------------------------------|------------------|-----------------|-------------------------------------------|---|----|--------------------------------------------|------|
| SCASRCKSRCRARRCRYVSVRYGGFCYCR<br>C           | antimicrobial    | marine Bivalvia | <i>Mytilus edulis</i><br>Linnaeus         | / | 31 | Whole protein<br>hydrolyzate;<br>ribosomal | [69] |
| GFFALIPKIISSPLFKTLLSAVGSALSSSGEQE            | immunomodulatory | marine Pisces   | <i>Pardachirus<br/>pavoninus</i> Lacepède | / | 33 | Whole protein<br>hydrolyzate;<br>ribosomal | [66] |
| GFFALIPKIISSPLFKTLLSAVGSALSSSGEQE            | antimicrobial    | marine Pisces   | <i>Pardachirus<br/>pavoninus</i> Lacepède | / | 33 | Whole protein<br>hydrolyzate;<br>ribosomal | [66] |
| GCASRCKAKCAGRRCKGWASASFRGRCYCK<br>CFRC       | antimicrobial    | marine Bivalvia | <i>Mytilus edulis</i><br>Linnaeus         | / | 34 | Whole protein<br>hydrolyzate;<br>ribosomal | [69] |
| GCASRCKAKCAGRRCKGWASASFRRCYCK<br>CFRC        | antimicrobial    | marine Bivalvia | <i>Mytilus edulis</i><br>Linnaeus         | / | 34 | Whole protein<br>hydrolyzate;<br>ribosomal | [69] |
| SCASRCKGHCRARRCGYYVSVLYRGRCYCK<br>CLRC       | antimicrobial    | marine Bivalvia | <i>Mytilus edulis</i><br>Linnaeus         | / | 34 | Whole protein<br>hydrolyzate;<br>ribosomal | [69] |
| GFGCPNNYACHQHCKSIRGYCGGYCAGWFR<br>LRCTCYRCG  | antimicrobial    | marine Bivalvia | <i>Mytilus edulis</i><br>Linnaeus         | / | 39 | Whole protein<br>hydrolyzate;<br>ribosomal | [69] |
| GFGCPNNYQCHRHCKSIPGRCGGYCGGWHR<br>LRCTCYRGC  | antimicrobial    | marine Bivalvia | <i>Mytilus edulis</i><br>Linnaeus         | / | 39 | Whole protein<br>hydrolyzate;<br>ribosomal | [69] |
| HPHVCTSYYCSKFCGTAGCTRYGCRNLHRG<br>KLCFCLHCSR | antimicrobial    | marine Bivalvia | <i>Mytilus edulis</i><br>Linnaeus         | / | 40 | Whole protein<br>hydrolyzate;<br>ribosomal | [69] |
| HSHACTSYWCGKFCGTASCTHYLCRVLHPG<br>KMCACVHCSR | antimicrobial    | marine Bivalvia | <i>Mytilus edulis</i><br>Linnaeus         | / | 40 | Whole protein<br>hydrolyzate;<br>ribosomal | [69] |

\*All taxonomical identifiers and authority have been verified for the most recent accepted form in the following databases: World Register of Marine Species [<http://www.marinespecies.org>]; AlgaeBase [[www.algaebase.org](http://www.algaebase.org)]; FishBase [[www.fishbase.se](http://www.fishbase.se)]. The reported species name might differ from the one reported in the original paper. Where the species name was not available a different taxonomical indicator has been employed.



## Reference:

- [1] Liu, R.; Zheng, W.; Li, J.; Wang, L.; Wu, H.; Wang, X.; Shi, L. Rapid identification of bioactive peptides with antioxidant activity from the enzymatic hydrolysate of *Macra veneriformis* by UHPLC–Q-TOF mass spectrometry. *Food Chem.* **2015**, *167*, 484–489.
- [2] Wu, H.; He, H.-L.; Chen, X.-L.; Sun, C.-Y.; Zhang, Y.-Z.; Zhou, B.-C. Purification and identification of novel angiotensin I-converting enzyme inhibitory peptides from shark meat hydrolysate. *Process Biochem.* **2008**, *43*, 457–461.
- [3] Aissaoui, N.; Abidi, F.; Hardouin, J.; Abdelkafi, Z.; Marrakchi, N.; Jouenne, T.; Marzouki, N. ACE inhibitory and antioxidant activities of novel peptides from *Scorpaena notata* by-product protein hydrolysate. *Int. J. Pep. Res. Ther.* **2017**, *23*, 13–23.
- [4] Suetsuna, K.; Maekawa, K.; Chen, J. R. Antihypertensive effects of *Undaria pinnatifida* (wakame) peptide on blood pressure in spontaneously hypertensive rats. *J. Nutr. Biochem.* **2004**, *15*(5), 267–272.
- [5] Byun, H. G.; Kim, S. K. Structure and activity of angiotensin I-converting enzyme inhibitory peptides derived from Alaskan pollack skin. *Bioch. Mol. Biol.* **2002**, *35*, 239–243.
- [6] Matsufuji, H.; Matsui, T.; Seki, E.; Osajima, K.; Nakashima, M.; Osajima, Y. Angiotensin I-converting enzyme inhibitory peptides in an alkaline proteinase hydrolysate derived from sardine muscle. *Biosci. Biotech. Biochem.* **1994**, *58*, 2244–2245.
- [7] Suetsuna, K. Separation and identification of antioxidant peptides from proteolytic digest of dried bonito. *Nippon Suisan Gakkaishi (Japanese Edition)* **1999**, *65*, 92–96.
- [8] Meisel, H.; Walsh, D. J.; Murray, B.; FitzGerald, R. J. ACE inhibitory peptides. in: *Nutraceutical proteins and peptides in health and disease*. Mine, Y.; Shahidi, F. Eds. Publisher: CRC Taylor & Francis Group, Boca Raton, London, New York, **2006**, pp. 269–315.
- [9] Ichimura, T.; Hu, J.; Aita, D. Q.; Maruyama, S. Angiotensin I-converting enzyme inhibitory activity and insulin secretion stimulative activity of fermented fish sauce. *J. Biosci. Bioeng.* **2003**, *96*, 496–499.
- [10] Erdmann, K.; Grosser, N.; Schipporeit, K.; Schröder, H. The ACE inhibitory dipeptide Met-Tyr diminishes free radical formation in human endothelial cells via induction of heme oxygenase-1 and ferritin. *J. Nutr.* **2006**, *136*, 2148–2152.
- [11] Ko, S. C.; Kang, N.; Kim E. A.; Kang, M. C.; Lee, S. H.; Kang, S. M.; Lee, J. B.; Jeon, B. T.; Kim, S. K.; Park, S. J.; Park, P. J.; Jung, W. K.; Kim, D.; Jeon, Y. J. A novel angiotensin I-converting enzyme (ACE) inhibitory peptide from a marine *Chlorella ellipsoidea* and its antihypertensive effect in spontaneously hypertensive rats. *Process Biochem.* **2012**, *47*(12), 2005–2011.
- [12] Murray, B. A.; FitzGerald, R. J. Angiotensin converting enzyme inhibitory peptides derived from food proteins: biochemistry, bioactivity and production. *Curr. Pharm. Des.* **2007**, *13*, 773–791.
- [13] Suetsuna, K. Antioxidant peptides from the protease digest of prawn (*Penaeus japonicus*) muscle. *Mar. Biotechnol.* **2000**, *2*, 5–10.
- [14] Yokoyama, K.; Chiba, H.; Yoshikawa, M. Peptide inhibitors for angiotensin I-converting enzyme from thermolysin digest of dried bonito. *Biosci. Biotech. Biochem.* **1992**, *56*, 1541–1545.
- [15] Bougatef, A.; Nedjar-Arroume, N.; Manni, L.; Ravallec, R.; Barkia, A.; Guillochon, D.; Nasri, M. Purification and identification of novel antioxidant peptides from enzymatic hydrolysates of sardinelle (*Sardinella aurita*) by-products proteins. *Food Chem.* **2010**, *118*, 559–565.
- [16] Furuta, T.; Miyabe, Y.; Yasui, H.; Kinoshita, Y.; Kishimura, H. Angiotensin I converting enzyme inhibitory peptides derived from phycobiliproteins of Dulse *Palmaria palmata*. *Mar. Drugs* **2016**, *14*, 32–42.

- [17] Samarakoon, K. W.; O-Nam, K.; Ko, J. Y.; Lee, J. H.; Kang, M. C.; Kim, D.; Baek, J. L.; Jung-Suck, L.; Jeon, Y. J. Purification and identification of novel angiotensin-I converting enzyme (ACE) inhibitory peptides from cultured marine microalgae (*Nannochloropsis oculata*) protein hydrolysate. *J. Appl. Phycol.* **2013**, *25*, 1595-1606.
- [18] Ukeda, H.; Matsuda, H.; Osajima, K.; Matsufuji, H.; Matsui, T.; Osajima, Y. Peptides from peptic hydrolyzate of heated sardine meat that inhibit angiotensin I converting enzyme. *Nippon Nogeikagaku Kaishi* **1992**, *66*, 25-29.
- [19] Liu, P.; Lan, X.; Yaseen, M.; Wu, S.; Feng, X.; Zhou, L.; Sun, J.; Liao, A.; Liao, D.; Sun, L. Purification, characterization and evaluation of inhibitory mechanism of ACE inhibitory peptides from pearl oyster (*Pinctada fucata martensii*) meat protein hydrolysate. *Mar. Drugs* **2019**, *17*(8), E463.
- [20] Tao, J.; Zhao, Y. Q.; Chi, C. F.; Wang, B. Bioactive peptides from cartilage protein hydrolysate of spotless smoothhound and their antioxidant activity *in vitro*. *Mar. Drugs* **2018**, *16*(4), pii: E100.
- [21] Balti, R.; Nedjar-Arroume, N.; Adjé, E. Y.; Guillochon, D.; Nasri, M. Analysis of novel angiotensin I-converting enzyme inhibitory peptides from enzymatic hydrolysates of cuttlefish (*Sepia officinalis*) muscle proteins. *J. Agric. Food Chem.* **2010**, *58*, 3840-3846.
- [22] Suetsuna, K.; Chen, J.-R. Identification of antihypertensive peptides from peptic digest of two microalgae, *Chlorella vulgaris* and *Spirulina platensis*. *Mar. Biotechnol.* **2001**, *3*, 305–309.
- [23] Harnedy, P. A.; O’Keeffe, M. B.; FitzGerald, R. J. Purification and identification of dipeptidyl peptidase (DPP) IV inhibitory peptides from the macroalga *Palmaria palmata*. *Food Chem.* **2015**, *172*, 400-406.
- [24] Suetsuna, K.; Nakano, T. Identification of an antihypertensive peptide from peptic digest of Wakame (*Undaria pinnatifida*). *J. Nutr. Biochem.* **2000**, *11*(9), 450-454.
- [25] Nguyen, M.; Zhong-Ji, Q.; Nguyen, V. T.; Choi, I. W.; Heo, S. J.; Oh, C.; Kang, D. H.; Kim, G.; Jung, W. K. Tetrameric peptide purified from hydrolysates of biodiesel byproducts of *Nannochloropsis oculata* induces osteoblastic differentiation through MAPK and Smad pathway on MG-63 and D1 cells. *Process Biochem.* **2013**, *48*, 1387-1394.
- [26] Jao, C. L.; Ko, W. C. 1,1-Diphenyl-2-picrylhydrazyl (DPPH) radical scavenging by protein hydrolyzates from tuna cooking juice. *Fisheries Sci.* **2002**, *68*, 430-435.
- [27] Jung, W. K.; Rajapakse, N.; Kim, S. K. Antioxidative activity of a low molecular weight peptide derived from the sauce of fermented blue mussel, *Mytilus edulis*. *Eur. Food Res. Technol.* **2005**, *220*, 535-539.
- [28] Lassoued, I.; Mora, L.; Barkia, A. M. C.; Nasri, M.; Toldra, F. Angiotensin I-converting enzyme inhibitory peptides FQPSF and LKYPI identified in *Bacillus subtilis* A26 hydrolysate of thornback ray muscle. *Int. J. Food Sci. Food Technol.* **2016**, *51*, 1604-1609.
- [29] Chi, C. F.; Hu F. Y.; Wang, B.; Ren, X. J.; Deng, S. G.; Wu, C. W. Purification and characterization of three antioxidant peptides from protein hydrolyzate of croceine croaker (*Pseudosciaena crocea*) muscle. *Food Chem.* **2015**, *168*, 662-667.
- [30] Vo, T. S.; Ryu, B.; Kim, S. K. Purification of novel anti-inflammatory peptides from enzymatic hydrolysate of the edible microalgal *Spirulina maxima*. *J. Funct. Foods* **2013**, *5*, 1336–1346.
- [31] Karaki, H.; Kuwahara, M.; Sugano, S.; Doi, C.M.; Doi, K.; Matsumura, N.; Shimizu, T. Oral administration of peptides derived from bonito bowels decreases blood pressure in spontaneously hypertensive rats. *Comp. Biochem. Physiol.* **1993**, *104C*, 351-353.

- [32] Balti, R.; Bougatef, A.; Sila, A.; Guillochon, D.; Dhulster, P.; Nedjar-Arroume, N. Nine novel angiotensin I-converting enzyme (ACE) inhibitory peptides from cuttlefish (*Sepia officinalis*) muscle protein hydrolysates and antihypertensive effect of the potent active peptide in spontaneously hypertensive rats. *Food Chem.* **2015**, *170*, 519-525.
- [33] Je, J.-Y.; Park, P.-J.; Kim, S.-K. Antioxidant activity of a peptide isolated from Alaska pollack (*Theragra chalcogramma*) frame protein hydrolysate. *Food Res. Int.* **2005**, *38*, 45–50.
- [34] Wako, Y.; Ishikawa, S.; Muramoto, K. Angiotensin I-converting enzyme inhibitors in autolysates of squid liver and mantle muscle. *Biosci. Biotech. Biochem.* **1996**, *60*, 1353-1355.
- [35] Nieto, J.; Veelaert, D.; Derua, R.; Waelkens, E.; Cerstiaens, A.; Coast, G.; Devreese, B.; Van Beeumen, J.; Calderon, J.; De Loof, A.; Schoofs, L. Identification of one tachykinin and two kinin related peptides in the brain of the white shrimp, *Penaeus vannamei*. *Biochem. Biophys. Res. Comm.* **1998**, *248*, 406-411.
- [36] Kang, K. H.; Qian, Z. J.; Ryu, B.; Karadeniz, F.; Kim, D.; Kim, S. K. Antioxidant peptides from protein hydrolysate of microalgae *Navicula incerta* and their protective effects in HepG2/CYP2E1 cells induced by ethanol. *Phytother Res.* **2012**, *26(10)*, 1555-1563. doi: 10.1002/ptr.460
- [37] Rajapakse, N.; Mendis, E.; Jung, W.-K.; Je, J.-Y.; Kim, S.-K. Purification of a radical scavenging peptide from fermented mussel sauce and its antioxidant properties. *Food Res. Int.* **2005**, *38*, 175-182.
- [38] Mendis, E.; Rajapakse, N.; Kim, S.-K. Antioxidant properties of a radical-scavenging peptide purified from enzymatically prepared fish skin gelatin hydrolysate. *J. Agric. Food Chem.* **2005**, *53*, 581–587.
- [39] Ngo, D. H.; Ryu, B.; Kim, S. K. Active peptides from skate (*Okamejei kenoei*) skin gelatin diminish angiotensin-I converting enzyme activity and intracellular free radical-mediated oxidation. *Food Chem.* **2014**, *143*, 246-255.
- [40] Hsu, K.-C. Purification of antioxidative peptides prepared from enzymatic hydrolysates of tuna dark muscle by-products. *Food Chem.* **2010**, *122*, 42-48.
- [41] Ghassem, M.; Arihara, K.; Babji, A. S.; Said, M.; Ibrahim, S. Purification and identification of ACE inhibitory peptides from Haruan (*Channa striatus*) myofibrillar protein hydrolysate using HPLC–ESI-TOF MS/MS. *Food Chem.* **2011**, *129*, 1770-1777. doi:10.1016/j.foodchem.2011.06.051
- [42] Montone, C. M.; Capriotti, A. L.; Cavaliere, C.; La Barbera, G.; Piovesana, S.; Zenezini Chiozzi, R.; Lagana', A. Peptidomic strategy for purification and identification of potential ACE-inhibitory and antioxidant peptides in *Tetrademus obliquus* microalgae. *Anal. Bioanal. Chem.* **2018**, *410*, 3573-3586.
- [43] Je, J.-Y.; Park, P.-J.; Kwon, J. Y.; Kim, S.-K. A novel angiotensin I converting enzyme inhibitory peptide from Alaska Pollack (*Theragra chalcogramma*) frame protein hydrolysate. *J. Agric. Food. Chem.* **2004**, *52*, 7842–7845.
- [44] Suetsuna, K.; Ukeda, H. Isolation of an octapeptide which possesses active oxygen scavenging activity from peptic digest of sardine muscle. *Nippon Suisan Gakkaishi* (Japanese Edition) **1999**, *65*, 1096-1099.
- [45] Kohama, Y.; Matsumoto, S.; Oka, H.; Teramoto, T.; Okabe, M.; Mimura, T. Isolation of angiotensin-converting enzyme inhibitor from tuna muscle. *Biochem. Biophys. Res. Commun.* **1988**, *155*, 332-337,
- [46] Hasan, F.; Kitagawa, M.; Kumada, Y.; Hashimoto, N.; Shiiba, M.; Katoh, S.; Terashima, M. Production kinetics of angiotensin-I converting enzyme inhibitory peptides from bonito meat in artificial gastric juice. *Process Biochem.* **2006**, *41*, 505-511.

- [47] Mendis, E.; Rajapakse, N.; Byun, H.-G.; Kim, S.-K. Investigation of jumbo squid (*Dosidicus gigas*) skin gelatin peptides for their in vitro antioxidant effects. *Life Sci.* **2005**, *77*, 2166-2178.
- [48] Ranathunga, S.; Rajapakse, N.; Kim, S.-K. Purification and characterization of antioxidative peptide derived from muscle of conger eel (*Conger myriaster*). *Eur. Food Res. Technol.* **2006**, *222*, 310-315.
- [49] He, H. L.; Liu, D.; Ma, C. B. Review on the angiotensin-I-converting enzyme (ACE) inhibitor peptides from marine proteins. *Appl. Biochem. Biotechnol.* **2013**, *169*(3), 738-749.
- [50] Lee, J. K.; Jeon, J.-K.; Byun, H.-G. Effect of angiotensin-converting enzyme inhibitory peptide purified from skate skin hydrolysate. *Food Chem.* **2011**, *125*, 495-499.
- [51] Byun, H.-G.; Lee, J. K.; Park, H. G.; Jeon, J.-K.; Kim, S.-K. Antioxidant peptides isolated from the marine rotifer (*Brachionus rotundiformis*). *Process Biochem.* **2009**, *44*, 842-846.
- [52] Hsu, K.-C.; Li-Chan, E. C. Y.; Jao, C.-L. Antiproliferative activity of peptides prepared from enzymatic hydrolysates of tuna dark muscle on human breast cancer cell line MCF-7. *Food Chem.* **2011**, *126*, 517-622.
- [53] Jun, S.-Y.; Park, P.-J.; Jung, W.-K.; Kim, S.-K. Purification and characterization of an antioxidative peptide from enzymatic hydrolysate of yellowfin sole (*Limanda aspera*) frame protein. *Eur. Food Res. Technol.* **2004**, *219*, 20-26.
- [54] Je, J.-Y.; Qian, Z.-J.; Lee, S.-H.; Byun, H.-G.; Kim, S.-K. Purification and antioxidant properties of bigeye tuna (*Thunnus obesus*) dark muscle peptide on free radical-mediated oxidative systems. *J. Med. Food* **2008**, *11*, 629-637.
- [55] Sheih, I.-C.; Fang, T. J.; Wu, T.-K.; Lin, P.-H. Anticancer and antioxidant activities of the peptide fraction from algae protein waste. *J. Agric. Food Chem.* **2010**, *58*, 1202-1206.
- [56] Wang, T. Y.; Hsieh, C. H.; Hung, C. C.; Jao, C. L.; Chen, M. C.; Hsu, K. C. Fish skin gelatin hydrolysates as dipeptidyl peptidase IV inhibitors and glucagon-like peptide-1 stimulators improve glycaemic control in diabetic rats: A comparison between warm- and cold-water fish. *J. Funct. Foods* **2015**, *18*, 330-340.
- [57] Huang, S.-L.; Jao, C.-L.; Hoc, K.-P.; Hsu, K.-C. Dipeptidyl-peptidase IV inhibitory activity of peptides derived from tuna cooking juice hydrolysates. *Peptides* **2012**, *35*, 114-121.
- [58] Fitzgerald, C.; Mora-Soler, L.; Gallagher, E.; O'Connor, P.; Prieto, J.; Soler-Vila, A.; Hayes, M. Isolation and characterization of bioactive pro-peptides with in vitro renin inhibitory activities from the macroalga *Palmaria palmata*. *J. Agric. Food Chem.* **2012**, *60*, 7421-7427.
- [59] Qian, Z.-J.; Jung, W.-K.; Byun, H.-G.; Kim, S.-K. Protective effect of an antioxidative peptide purified from gastrointestinal digests of oyster, *Crassostrea gigas* against free radical induced DNA damage. *Bioresour. Technol.* **2008**, *99*, 3365-3371.
- [60] Rajapakse, N.; Mendis, E.; Byun, H.-G.; Kim, S.-K. Purification and in vitro antioxidative effects of giant squid muscle peptides on free radical-mediated oxidative systems. *J. Nutr. Biochem.* **2005**, *16*, 562-569.
- [61] Je, J.-Y.; Qian, Z.-J.; Byun, H.-G.; Kim, S.-K. Purification and characterization of an antioxidant peptide obtained from tuna backbone protein by enzymatic hydrolysis. *Process Biochem.* **2007**, *42*, 840-846.
- [62] Alemán, A.; Giménez, B.; Pérez-Santin, E.; Gómez-Guillén, M. C.; Montero, P. Contribution of Leu and Hyp residues to antioxidant and ACE-inhibitory activities of peptide isolated from squid gelatin hydrolysate. *Food Chem.* **2011**, *125*, 334-341.

- [63] Li, W.; Ye, S.; Zhang, Z.; Tang, J.; Jin, H.; Huang, F.; Yang, Z.; Tang, Y.; Chen, Y.; Ding, G.; et al. Purification and characterization of a novel pentadecapeptide from protein hydrolysates of *Cyclina sinensis* and its immunomodulatory effects on RAW264.7 cells. *Mar. Drugs* **2019**, *17*, E30.
- [64] Rajapakse, N.; Jung, W.-K.; Mendis, E.; Moon, S.-H.; Kim, S.-K. A novel anticoagulant purified from fish protein hydrolysate inhibits factor XIIa and platelet aggregation. *Life Sci.* **2005**, *76*, 2607-2619.
- [65] Kim, S.-Y.; Je, J.-Y.; Kim, S.-K. Purification and characterization of antioxidant peptide from hoki (*Johnius belengerii*) frame protein by gastrointestinal digestion. *J. Nutr. Biochem.* **2007**, *18*, 31-38.
- [66] Saberwal, G.; Nagaraj, R. Cell-lytic and antibacterial peptides that act by perturbing the barrier function of membranes: facets of their conformational features, structure-function correlations and membrane-perturbing abilities. *Biochim. Biophys. Acta* **1994**, *1197*, 109-131.
- [67] Jung, W. K.; Kim, S.-K. Isolation and characterization of an anticoagulant oligopeptide from blue mussel, *Mytilus edulis*. *Food Chem.* **2009**, *117*, 687-692.
- [68] Sung, W. S.; Lee, D. G. Pleurocidin-derived antifungal peptides with selective membrane-disruption effect. *Biochem. Biophys. Res. Commun.*, **2008**, *369*, 858-861.
- [69] Mitta, G.; Vandelbulcke, N. T.; Romestand, B.; Beauvillain, S. M.; Roch, P. Differential distribution and defence involvement of antimicrobial peptides in mussel. *J. Cell Sci.* **2000**, *113*, 2759-2769.

**Table S2: Brief overview of principal mechanisms behind different bioactivities and quick comparison between different bioassays used to assess these activities, with related references**

| Bioactivities    | Main mechanism(s)                                                                                                                                                                                                                                                                                                                                                                                                                                                                                                                               | Brief comparison of bioassays                                                                                                                                                                                                                                                                                                                                                                                                                                                                                                                                                                                                                                                                                                                                                                                                                                                                                                                                                                                                                                                        | References |
|------------------|-------------------------------------------------------------------------------------------------------------------------------------------------------------------------------------------------------------------------------------------------------------------------------------------------------------------------------------------------------------------------------------------------------------------------------------------------------------------------------------------------------------------------------------------------|--------------------------------------------------------------------------------------------------------------------------------------------------------------------------------------------------------------------------------------------------------------------------------------------------------------------------------------------------------------------------------------------------------------------------------------------------------------------------------------------------------------------------------------------------------------------------------------------------------------------------------------------------------------------------------------------------------------------------------------------------------------------------------------------------------------------------------------------------------------------------------------------------------------------------------------------------------------------------------------------------------------------------------------------------------------------------------------|------------|
| ACE inhibitors   | Both competitive and noncompetitive inhibitors of angiotensin-converting enzyme (ACE).                                                                                                                                                                                                                                                                                                                                                                                                                                                          | <i>In vitro</i> measurement of ACE-inhibition: quick, relatively cheap, but sensitivity is affected by the type of compound used as a substrate (since type of substrate would dictate method of product detection).<br><i>In vivo</i> detections of changes in systolic and diastolic blood pressures: slow and highly dependent of age and hormonal status.                                                                                                                                                                                                                                                                                                                                                                                                                                                                                                                                                                                                                                                                                                                        | [1-8]      |
| antioxidative    | Scavenging of free radicals, prevention of lipid peroxidation and/or metal chelation.                                                                                                                                                                                                                                                                                                                                                                                                                                                           | Testing is usually done <i>in vitro</i> , but direct comparison between different tests' specificity and sensitivity is hampered by three factors: 1. Different tests are measuring different parameters (for example, certain tests, such as oxygen radical absorbance detect transfer of hydrogen ions, others like DPPH (1,1-diphenyl-2-picrylhydrazyl) and ABTS (2,2'-azino-bis-3ethylbenzthiazoline-6-sulfonic acid) measure transfer of electrons, $\beta$ -carotene bleaching assay determine rate of lipid oxidation, etc.); 2. Due to the usage of different substrates, results of certain assays (especially DPPH and ABTS) could be expressed in different units; 3. Sensitivity of tests that measure electron transfer is also depended on polarity (for example, DPPH shows higher sensitivity and reproducibility when hydrophilic substrates are detected).                                                                                                                                                                                                         | [9-16]     |
| immunomodulating | The highest number of possible mechanisms – changes in gene expression (especially genes coding for caspases and genes coding for proteins involved in signaling transduction pathways such as MAPK and NF- $\kappa$ B), inhibition of cell proliferation (often through microtubule inhibition), inhibition of protein synthesis (sometimes through direct interaction with ribosome), antiinflammatory effect through inhibition of monocytes binding to endothelia, regulation of cytokine levels (especially TNF), cytotoxic effect through | Both <i>in vitro</i> and <i>in vivo</i> tests are used for assessing immunomodulatory effect. In both <i>in vivo</i> and <i>in vitro</i> testing different activities are assessed with different assays (for example, cytotoxic activity <i>in vitro</i> can be assessed using staining tests, such as acid phosphatase assay, neutral red uptake assay, lactate dehydrogenase assay, etc; apoptosis can be measured by caspase assay and monitoring changes in mitochondrial transmembrane potential or DNA synthesis); cytokine release <i>in vitro</i> is often monitored by ELISA (enzyme-linked immunosorbant assay), etc.; <i>in vivo</i> experiments include monitoring in weight changes, changes in cytokine profiles, occurrence of swelling, measuring indexes of spleen and thymus status, monitoring hemolysin content and release of histamine, etc. Similar as with monitoring antihypertensive effect <i>in vivo</i> , immunological effect <i>in vivo</i> depends of variety of factors (age, sex, nutrition, etc.). Therefore, reproducibility of results is low. | [17-24]    |

|               |                                                                                                                                                                                                                                                                                                                                                                                                                                                                                                                                                                                                                                                                                                                                                                                    |                                                                                                                                                                                                                                                                                                                                                                                                                                                                                                                                                                                                                                                                                                                                                                                                                                                                                                                                                                                                                         |         |
|---------------|------------------------------------------------------------------------------------------------------------------------------------------------------------------------------------------------------------------------------------------------------------------------------------------------------------------------------------------------------------------------------------------------------------------------------------------------------------------------------------------------------------------------------------------------------------------------------------------------------------------------------------------------------------------------------------------------------------------------------------------------------------------------------------|-------------------------------------------------------------------------------------------------------------------------------------------------------------------------------------------------------------------------------------------------------------------------------------------------------------------------------------------------------------------------------------------------------------------------------------------------------------------------------------------------------------------------------------------------------------------------------------------------------------------------------------------------------------------------------------------------------------------------------------------------------------------------------------------------------------------------------------------------------------------------------------------------------------------------------------------------------------------------------------------------------------------------|---------|
|               | opening of voltage-gated membrane channels, etc.                                                                                                                                                                                                                                                                                                                                                                                                                                                                                                                                                                                                                                                                                                                                   | Additionally, since <i>in vivo</i> experiments are done in rats, comparison of rat and human immune response is debatable.                                                                                                                                                                                                                                                                                                                                                                                                                                                                                                                                                                                                                                                                                                                                                                                                                                                                                              |         |
| antidiabetic  | Usually competitive inhibitors of dipeptidyl peptidase IV (DPPIV); however interaction with glucagon-like peptide (GLP) receptor and glucose-dependent insulinotropic polypeptide (GIP) were also reported, as well as changes in gene expression (in particular up-regulation of genes encoding glucose transporters –GLUT4).                                                                                                                                                                                                                                                                                                                                                                                                                                                     | <i>In vitro</i> tests usually include measurement of enzymatic activities of enzyme such as dipeptidyl peptidase IV, $\alpha$ -glucosidase, $\alpha$ -amylase, N-acetyl-glucosaminidase, etc. Percentage of inhibition of these enzymes is usually determined using spectrometry (due to the usage of colored substrates and forming of colored products). These methods are fast, relatively inexpensive and have relatively high reproducibility. <i>In vivo</i> assays either determine concentration of glucose in blood (with HPLC (high performance liquid chromatography) being method of choice, due to its high sensitivity and reproducibility) or formation of AGE (advanced glycosylated end products). Recently, technique that employs gold labeled monoclonal and polyclonal antibodies against AGE products is becoming popular due to low detection limit, specificity and high reproducibility of results.                                                                                            | [25-32] |
| antimicrobial | Several mechanisms are employed (often simultaneously): binding to specific compounds in bacterial membrane (for example, callinectin binds to anti-callinectin-like peptides) which results in formation of pores and cell lysis; phagocytosis as result of binding to compounds in cell wall (as in case of certain mytilins), lysis as result of changes in bacterial membrane potential (by, for example, blocking K <sup>+</sup> channels), inhibition of basic metabolic pathways (such as inhibition of protein and nucleic acid synthesis and oxidative phosphorylation) usually by binding to proteins crucial for these processes, inhibition of cell growth through direct targeting of bacterial membrane molecules (for example, lectins inhibit growth by binding to | Testing for antimicrobial activity is usually done <i>in vitro</i> . Two main categories of antimicrobial tests are assays measuring cell growth (like agar diffusion (inhibition zone) assay) and assays measuring cell viability (like MTT test, apoptosis assay, etc.). Inhibition zone assay is cheap, easy to perform, but gives no data about minimum inhibitory concentration (MIC) that serves as principal parameter of antimicrobial activity. This problem can be solved by so-called agar dilution methods where various concentrations of compound are incorporated into agar, allowing for calculation of MIC. MTT test assesses cell viability by measuring activity of NAD(P)H-dependent oxidoreductase enzymes. It is characterized by high sensitivity, but it is more costly and harder to perform compared to agar dilution test. Novel methods like qPCR, flow cytometry, fluorescence-based assays, etc. have good reproducibility and high sensitivity, but their high price limits their usage. | [33-43] |

|                |                                                                                                                                                                                                                                                                                                                                                                                                                                                        |                                                                                                                                                                                                                                                                                                                                                                                                                                                                                                                                                                                                                                                                                                                                                                                                                                                                                                                                                             |         |
|----------------|--------------------------------------------------------------------------------------------------------------------------------------------------------------------------------------------------------------------------------------------------------------------------------------------------------------------------------------------------------------------------------------------------------------------------------------------------------|-------------------------------------------------------------------------------------------------------------------------------------------------------------------------------------------------------------------------------------------------------------------------------------------------------------------------------------------------------------------------------------------------------------------------------------------------------------------------------------------------------------------------------------------------------------------------------------------------------------------------------------------------------------------------------------------------------------------------------------------------------------------------------------------------------------------------------------------------------------------------------------------------------------------------------------------------------------|---------|
|                | mannans), inhibition of cell-cell signaling and formation of biofilms, activation of immune response (usually through activation of proinflammatory response).                                                                                                                                                                                                                                                                                         |                                                                                                                                                                                                                                                                                                                                                                                                                                                                                                                                                                                                                                                                                                                                                                                                                                                                                                                                                             |         |
| antithrombotic | Inhibition of platelet aggregation, due to inhibition of coagulation factors. This inhibition can be achieved either through formation of complexes (this is particular true for interactions with thrombin) or through enzymatic action (peptides acting like proteases and cleaving specific clotting factors in cascade). Additionally, peptides can cause depletion of Ca <sup>2+</sup> ions from blood (thus interfering with signaling cascade). | Most commonly used <i>in vitro</i> assay is so-called APTT (activated partial thromboplastin time) assay that measures time necessary for a blood clot to form. Although this test is quick and easy to perform there are several issues that could affect reliability of results. First, quality of reagents and instrumentation can affect both sensitivity and reproducibility of results. Second, there is a number of interfering compounds (such as cholesterol, vitamin C, etc.) that falsely prolong clotting time. During <i>in vivo</i> tests, percentage of thrombosis inhibition is determined by firstly inducing lesions in endothelium (usually by using lasers) and then intravenously introducing bioactive peptide. Like previously stated, main problems with such <i>in vivo</i> tests are great variability between subjects, as well as difficulty of correlating results obtained with animal models with those obtained for humans. | [44-51] |

- [1] He, H.; Liu, D.; Ma, C. Review on the angiotensin-I-converting enzyme (ACE) inhibitor peptides from marine proteins. *Appl. Biochem. Biotechnol.* **2013**, *169*, 738–749. <https://doi.org/10.1007/s12010-012-0024-y>
- [2] Abdelhedi, O.; Nasri, M. Basic and recent advances in marine antihypertensive peptides: Production, structure-activity relationship and bioavailability. *Trends Food Sci. Technol.* **2019**, *88*, 543-557. <https://doi.org/10.1016/j.tifs.2019.04.002>
- [3] Pujiastuti, D.Y.; Amin, M.N.G.; Alamsjah, M.A.; Hsu, J.-L. Marine organisms as potential sources of bioactive peptides that inhibit the activity of angiotensin I-converting enzyme: a review. *Molecules* **2019**, *24*(14), 2541. <https://doi.org/10.3390/molecules24142541>
- [4] Abachi, S.; Bazinet, L.; Beaulieu, L. Antihypertensive and angiotensin-I-converting enzyme (ACE)-inhibitory peptides from fish as potential cardioprotective compounds. *Mar. Drugs* **2019**, *17*, 613. <https://doi.org/10.3390/md17110613>
- [5] Qian, Z.J.; Je, J.Y.; Kim, S.K. Antihypertensive effect of angiotensin-I converting enzyme-inhibitory peptide from hydrolysates of bigeye tuna dark muscle, *Thunnus obesus*. *J. Agric. Food Chem.* **2007**, *55*, 8398–8403. <https://doi.org/10.1021/jf501368a>
- [6] Duan, X.; Wu, F.; Li, M.; Yang, N.; Wu, C.; Jin, Y.; Xu, X. Naturally occurring angiotensin I-converting enzyme inhibitory peptide from a fertilized egg and its inhibitory mechanism. *J. Agric. Food Chem.* **2014**, *62*(24), 5500–5506. <https://doi.org/10.1021/jf0710635>



- [7] Balti, R.; Bougatef, A.; Sila, A.; Guillochon, D.; Dhulster, P.; Nedjar-Arroume, N. Nine novel angiotensin I-converting enzyme (ACE) inhibitory peptides from cuttlefish (*Sepia officinalis*) muscle protein hydrolysates and antihypertensive effect of the potent active peptide in spontaneously hypertensive rats. *Food Chem.* **2015**, *170*, 519–525. <http://doi.org/10.1016/j.foodchem.2013.03.091>
- [8] Lee, S.-H.; Qian, Z.; Kim, S.-K. A novel angiotensin I converting enzyme inhibitory peptide from tuna frame protein hydrolysate and its antihypertensive effect in spontaneously hypertensive rats. *Food Chem.* **2010**, *118*(1), 96–102. <https://doi.org/10.1016/j.foodchem.2009.04.086>
- [9] Aissaoui, N.; Abidi, F.; Hardouin, J. ACE inhibitory and antioxidant activities of novel peptides from *Scorpaena notata* by-product protein hydrolysate. *Int. J. Pept. Res. Ther.* **2017**, *23*, 13–23. <https://doi.org/10.1007/s10989-016-9536-6>
- [10] Ngo, D.-H.; Vo, T.-S.; Ngo, D.-N.; Wijesekara, I.; Kim, S.-K. Biological activities and potential health benefits of bioactive peptides derived from marine organisms. *Int. J. Biol. Macromol.* **2012**, *51*, 378–383. <http://dx.doi.org/10.1016/j.ijbiomac.2012.06.001>
- [11] Ngo, D.-H.; Kim, S.-K. Marine bioactive peptides as potential antioxidants. *Curr. Protein Pep. Sci.* **2013**, *14*(3), 189–198. <http://doi.org/10.2174/13892037113149990041>
- [12] Wu, R.; Chen, L.; Liu, D.; Huang, J.; Zhang, J.; Xiao, X.; Lei, M.; Chen, Y.; He, H. Preparation of antioxidant peptides from salmon byproducts with bacterial extracellular proteases. *Mar. Drugs* **2017**, *15*(1), 4–23. <https://doi.org/10.3390/md15010004>
- [13] Tao, J.; Zhao, Y.Q.; Chi, C.F.; Wang, B. Bioactive peptides from cartilage protein hydrolysate of spotless smoothhound and their antioxidant activity *in vitro*. *Mar. Drugs* **2018**, *16*(4), 100–117. <https://doi.org/10.3390/md16040100>
- [14] Thaipong, K.; Boonprakob, U.; Crosby, K.; Cisneros-Zevallos, L.; Hawkins Byrne, D. Comparison of ABTS, DPPH, FRAP, and ORAC assays for estimating antioxidant activity from guava fruit extracts. *J. Food Compos. Anal.* **2006**, *19*, 669–675. <https://doi.org/10.1016/j.jfca.2006.01.003>
- [15] Floegel, A.; Kim, D.-O.; Chung, S.-J.; Koo, S.I.; Chun, O.K. Comparison of ABTS/DPPH assays to measure antioxidant capacity in popular antioxidant-rich US foods. *J. Food Compos. Anal.* **2011**, *24*, 1043–1048. <https://doi.org/10.1016/j.jfca.2011.01.008>
- [16] Alogulu, H.Ş.; Öner, Z. Determination of antioxidant activity of bioactive peptide fractions obtained from yogurt. *J. Dairy Sci.* **2011**, *94*, 5305–5314. <https://doi.org/10.3168/jds.2011-4285>
- [17] Wang, Y.-K.; He, H.-L.; Wang, G.-F.; Wu, H.; Zhou, B.-C.; Chen, X.-L.; Zhang, Y.-Z. Oyster (*Crassostrea gigas*) hydrolysates produced on a plant scale have antitumor activity and immunostimulating effects in BALB/c mice. *Mar. Drugs* **2010**, *8*, 255–268; <https://doi.org/10.3390/md8020255>
- [18] Subhan, F.; Kang, H. Y.; Lim, Y.; Ikram, M.; Baek, S.-Y.; Jin, S.; Jeong, Y. H.; Kwak, J. Y.; Yoon, S. Fish scale collagen peptides protect against CoCl<sub>2</sub>/TNF- $\alpha$  induced cytotoxicity and inflammation via inhibition of ROS, MAPK, and NF- $\kappa$ B pathways in HaCaT cells. *Oxid. Med. Cell Longev.* **2017**, Article ID 9703609. <https://doi.org/10.1155/2017/9703609>
- [19] Agrawal, S.; Acharya, D.; Adholeya, A.; Barrow, C. J.; Deshmukh, S. K. Nonribosomal peptides from marine microbes and their antimicrobial and anticancer potential. *Front. Pharmacol.* **2017**, *8*, 828. <https://doi.org/10.3389/fphar.2017.00828>
- [20] Fan, M.; Nath, A. K.; Tang, Y.; Choi, Y.-J.; Debnath, T.; Choi, E.-J.; Kim, E.-K. Investigation of the anti-prostate cancer properties of marine-derived compounds. *Mar. Drugs* **2018**, *16*, 160; <https://doi.org/10.3390/md16050160>
- [21] Romero, A.; Estevez-Calvar, N.; Dios, S.; Figueras, A.; Novoa, B. New insights into the apoptotic process in mollusks: characterization of caspase genes in *Mytilus galloprovincialis*. *PLoS ONE* **2011**, *6*(2): e17003. <https://doi.org/10.1371/journal.pone.0017003>

- [22] Clay, T.M.; Hobeika, A.C.; Mosca, P.J.; Lyerly, H.K.; Morse, M. Assays for monitoring cellular immune responses to active immunotherapy of cancer. *Clin. Cancer Res.* **2011**, *7*(5), 1127–1135.
- [23] Galli, S.J.; Borregaard, N.; Wynn, T.A. Phenotypic and functional plasticity of cells of innate immunity: Macrophages, mast cells and neutrophils. *Nat. Immunol.* **2011**, *12*(11), 1035–1044. <https://doi.org/10.1038/ni.2109>
- [24] Maestri, E.; Marmiroli, M.; Marmiroli, N. Bioactive peptides in plant-derived foodstuffs. *J. Proteomics* **2016**, *147*, 140–155. <https://doi.org/10.1016/j.jprot.2016.03.048>
- [25] Xia, E.-Q.; Zhu, S.-S.; He, M.-J.; Luo, F.; Fu, C.-Z.; Zou, T.-B. Marine peptides as potential agents for the management of type 2 Diabetes Mellitus—A prospect. *Mar. Drugs* **2017**, *15*, 88. <https://doi.org/10.3390/md15040088>
- [26] Yan, J.; Zhao, J.; Yang, R.; Zhao, W. Bioactive peptides with antidiabetic properties: a review. *Int. J. Food Sci. Tech.* **2019**, *54*(6), 1909–1919. <https://doi.org/10.1111/ijfs.14090>
- [27] Nauck, M. Incretin therapies: highlighting common features and differences in the modes of action of glucagon-like peptide 1 receptor agonists and dipeptidyl peptase-4 inhibitors. *Diabetes Obes. Metab.* **2016**, *18*, 206–213. <https://doi.org/10.1111/dom.12591>
- [28] McIntosh, C.H.S.; Demuth, H.U.; Pospisilik, A.; Pederson, A. Dipeptidyl peptidase IV inhibitors: how do they work as new antidiabetic agents? *Regul. Pept.* **2005**, *128*(2), 159–165. <https://doi.org/10.1016/j.regpep.2004.06.001>
- [29] Kehinde, B.A.; Sharma, P. Recently isolated antidiabetic hydrolysates and peptides from multiple food sources: a review. *Crit. Rev. Food Sci. Nutr.* **2018**, *21*, 1–19. <https://doi.org/10.1080/10408398.2018.1528206>
- [30] Ramadhan, A.H.; Nawas, T.; Zhang, X.; Pembe, W.M.; Xia, W.; Xu, Y. Purification and identification of a novel antidiabetic peptide from Chinese giant salamander (*Andrias davidianus*) protein hydrolysate against  $\alpha$ -amylase and  $\alpha$ -glucosidase. *Int. J. Food Prop.* **2017**, *20*:sup3, S3360S3372. <https://doi.org/10.1080/10942912.2017.1354885>
- [31] Lauritano, C.; Ianora, A. Marine organisms with anti-diabetes properties. *Mar. Drugs* **2016**, *14*(12), 220. <https://doi.org/10.3390/md14122020>
- [32] Admassu, H.; Gasmalla, M.A.A.; Yang, R.; Zhao, W. Bioactive peptides derived from seaweed protein and their health benefits: antihypertensive, antioxidant, and antidiabetic properties. *J. Food Sci.* **2018**, *83*(1), 6–16. <http://doi.org/10.1111/1750-3841.14011>
- [33] Giordano, D.; Costantini, M.; Coppola, D.; Lauritano, C.; Núñez Pons, L.; Ruocco, N.; di Prisco, G.; Ianora, A.; Verde, C. Chapter five - Biotechnological applications of bioactive peptides from marine sources. In *Advances in Microbial Physiology*; Poole, R.K., Eds; Publisher: Academic Press, Cambridge, Massachusetts, United States, **2018**, Volume 73, pp. 171–220. <http://doi.org/10.1016/bs.ampbs.2018.05.002>
- [34] Choudhary, A.; Naughton, L.M.; Montánchez, I.; Dobson, A.D.W.; Rai, D.K. Current status and future prospects of marine natural products (MNPs) as antimicrobials. *Mar. Drugs* **2017**, *15*(9), 272. <https://doi.org/10.3390/md15090272>
- [35] Kang, H.K.; Lee, H.H.; Seo, C.H.; Park, Y. Antimicrobial and immunomodulatory properties and applications of marine-derived proteins and peptides. *Mar. Drugs* **2019**, *17*, 350. <https://doi.org/10.3390/md17060350>
- [36] Shannon, E.; Abu-Ghannam, N. Antibacterial derivatives of marine algae: an overview of pharmacological mechanisms and applications. *Mar. Drugs* **2016**, *14*, 81. <https://doi.org/10.3390/md14040081>

- [37] Semreen, M.H.; El-Gamal, M.I.; Abdin, S.; Alkhazraji, H.; Kamal, L.; Hammad, S.; El-Awady, F.; Waleed, D.; Kourbad, L. Recent updates of marine antimicrobial peptides. *Saudi Pharm. J.* **2018**, *26*(3), 396–409. <http://doi.org/10.1016/j.jps.2018.01.001>
- [38] Omardien, S.; Brul, S.; Zaat, S.A. Antimicrobial activity of cationic antimicrobial peptides against gram-positives: current progress made in understanding the mode of action and the response of bacteria. *Front. Cell Dev. Biol.* **2016**, *4*, 111. <https://doi.org/10.3389/fcell.2016.00111>
- [39] Najafian, L.; Babji, A.S. A review of fish-derived antioxidant and antimicrobial peptides: Their production, assessment, and applications. *Peptides* **2012**, *33*(1), 178–185. <https://doi.org/10.1016/j.peptides.2011.11.013>
- [40] Tang, Z.R.; Sun, Z.H.; Tang, X.S.; Feng, Z.M.; Zhou, D.; Xiao, D.F.; Zhang, B.; Li, L.L. Dietary bovine lactoferricin improved gut microflora, benefited intestinal mucosal morphology and inhibited circular cytokines delivery in 21-day weaned piglets. *J. Appl. Anim. Res.* **2011**, *39*(2), 153–157. <https://doi.org/10.1080/09712119.2011.565570>
- [41] Leoni, G.; De Poli, A.; Mardirossian, M.; Gambato, S.; Florian, F.; Venier, P.; Wilson, D.N.; Tossi, A.; Pallavicini, A.; Gerdol, M. Myticalins: A novel multigenic family of linear, cationic antimicrobial peptides from marine mussels (*Mytilus spp.*). *Mar. Drugs* **2017**, *15*(8), 261. <https://doi.org/10.3390/md15080261>
- [42] Kumar, P.; Kizhakkedathu, J.N.; Straus, S.K. Antimicrobial peptides: diversity, mechanism of action and strategies to improve the activity and biocompatibility *in vivo*. *Biomolecules* **2018**, *8*, 4. <https://doi.org/10.3390/biom8010004>
- [43] Jiang, Z.; Vasil, A.I.; Hale, J.D.; Hancock, R.E.W.; Vasil, M.L.; Hodges, R.S. Effects of net charge and the number of positively charged residues on the biological activity of amphipathic  $\alpha$ -helical cationic antimicrobial peptides. *Biopolymers* **2008**, *90*(3), 369–383. <https://doi.org/10.1002/bip.20911>
- [44] Azoulay, Z.; Rapaport, H. The assembly state and charge of amphiphilic  $\beta$ -sheet peptides affect blood clotting. *J. Mater. Chem. B*, **2016**, *4*, 3859–3867. <https://doi.org/10.1039/C6TB00330C>
- [45] Jung, W.K.; Je, J.Y.; Kim, H.J.; Kim, S.K. A novel anticoagulant protein from *Scapharca broughtonii*. *J. Biochem. Mol. Biol.* **2002**, *35*(2), 199–205. <https://doi.org/10.5483/bmbrep.2002.35.2.199>
- [46] Jung, W.K.; Kim, S. K. Isolation and characterisation of an anticoagulant oligopeptide from blue mussel, *Mytilus edulis*. *Food Chem.* **2009**, *117*, 687–692. <https://doi.org/10.1016/j.foodchem.2009.04.077>
- [47] Qiao, M.; Tu, M.; Wang, Z.; Mao, F.; Chen, H.; Qin, L.; Du, M. Identification and antithrombotic activity of peptides from Blue Mussel (*Mytilus edulis*) protein. *Int. J. Mol. Sci.* **2018**, *19*(1), 138–149. <https://doi.org/10.3390/ijms19010138>
- [48] Rajapakse, N.; Jung, W.K.; Mendis, E.; Moon, S.H.; Kim, S.K. A novel anticoagulant purified from fish protein hydrolysate inhibits factor XIIa and platelet aggregation. *Life Sci.* **2005**, *76*(22), 2607–2619. <https://doi.org/10.1016/j.lfs.2004.12.010>
- [49] Shimizu, M.; Sawashita, N.; Morimatsu, F.; Ichikawa, J.; Taguchi, Y.; Ijiri, Y.; Yamamoto, J. Antithrombotic papain-hydrolyzed peptides isolated from pork meat. *Thromb. Res.* **2009**, *123*(5), 753–757. <https://doi.org/10.1016/j.thromres.2008.07.005>
- [50] McGraw, A.; Hillarp, A.; Echenagucia, M. Considerations in the laboratory assessment of haemostasis. *Haemophilia* **2010**, *16* (Suppl. 5), 74–78. <https://doi.org/10.1111/j.1365-2516.2010.02302.x>
- [51] Gils, C.; Vinholt, P.J.; Nybo, M. Falsely prolonged activated partial thromboplastin time – a pre- and post-analytical issue. *Biochem. Med. (Zagreb)* **2019**, *29*(1), 011001. <https://doi.org/10.11613/BM.2019.011001>
